# Supplementary material for: microRNA-17 family promotes polycystic kidney disease progression through modulation of mitochondrial metabolism
Source: PubMed Central journal article supplement (PMC5316862; doi:10.1038/ncomms14395), 2017-02-16
Supplement: ncomms14395-s1.pdf [file ncomms14395-s1.pdf]

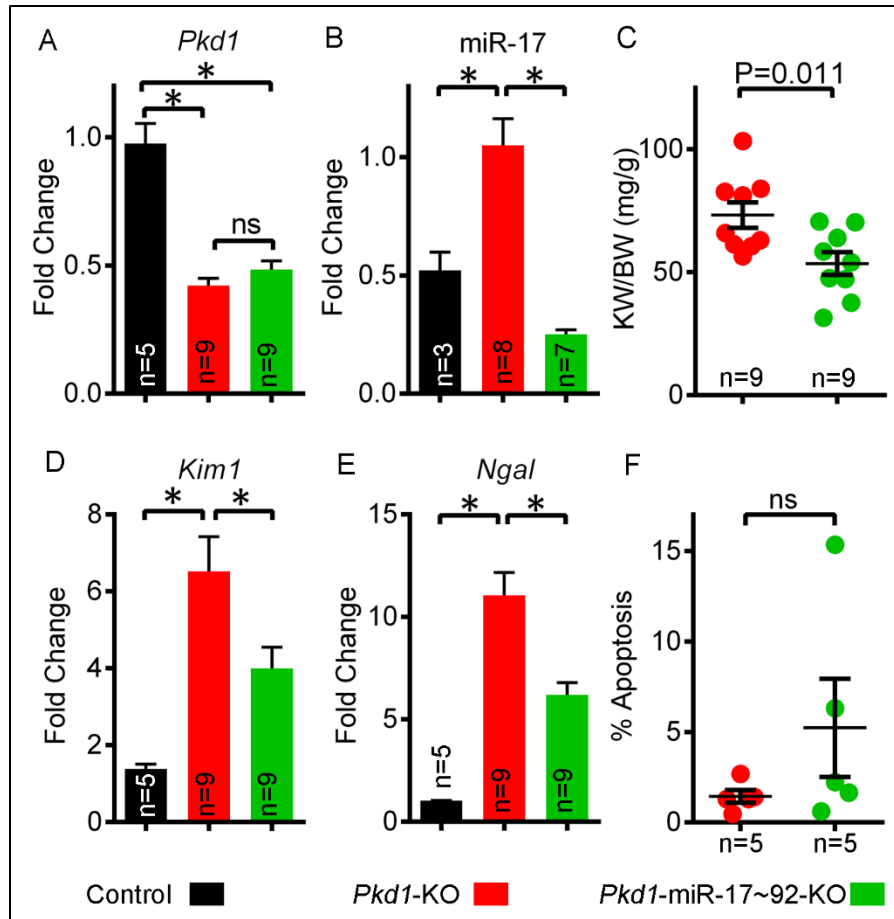

**Supplementary Figure 1:** To test the role of miR-17~92 in orthologous genetic model of ADPKD, we generated *Ksp/Cre;Pkd1<sup>F/F</sup>* (*Pkd1*-KO) and *Ksp/Cre;Pkd1<sup>F/F</sup>;miR-17~92<sup>F/F</sup>* (*Pkd1*-miR-17~92KO) mice. (A) Q-PCR analysis revealed that compared to control kidneys (black), *Pkd1* expression was equally reduced in both *Pkd1*-KO (red) and *Pkd1*-miR-17~92KO (green) kidneys, indicating that a similar level of *Cre/loxP* recombination was observed. (B) Q-PCR analysis revealed that, compared to control kidneys, miR-17 expression was increased in *Pkd1*-KO kidneys, whereas its expression was reduced in *Pkd1*-miR-17~92KO mice. (C) Kidney-weight-to-body-weight (KW/BW) ratio and the expression of kidney injury markers (D) *Kim1* and (E) *Ngal* was reduced in *Pkd1*-miR-17~92KO compared to *Pkd1*-KO kidneys. (F) The number of cyst epithelia undergoing apoptosis did not change in *Pkd1*-miR-17~92KO compared to *Pkd1*-KO kidneys. Error bars indicate SEM. \* indicates  $P < 0.05$ , ns indicates  $P > 0.05$ . One-way ANOVA, Tukey's multiple comparisons test (A, B, D, E), Student's unpaired *t*-test (C, F)

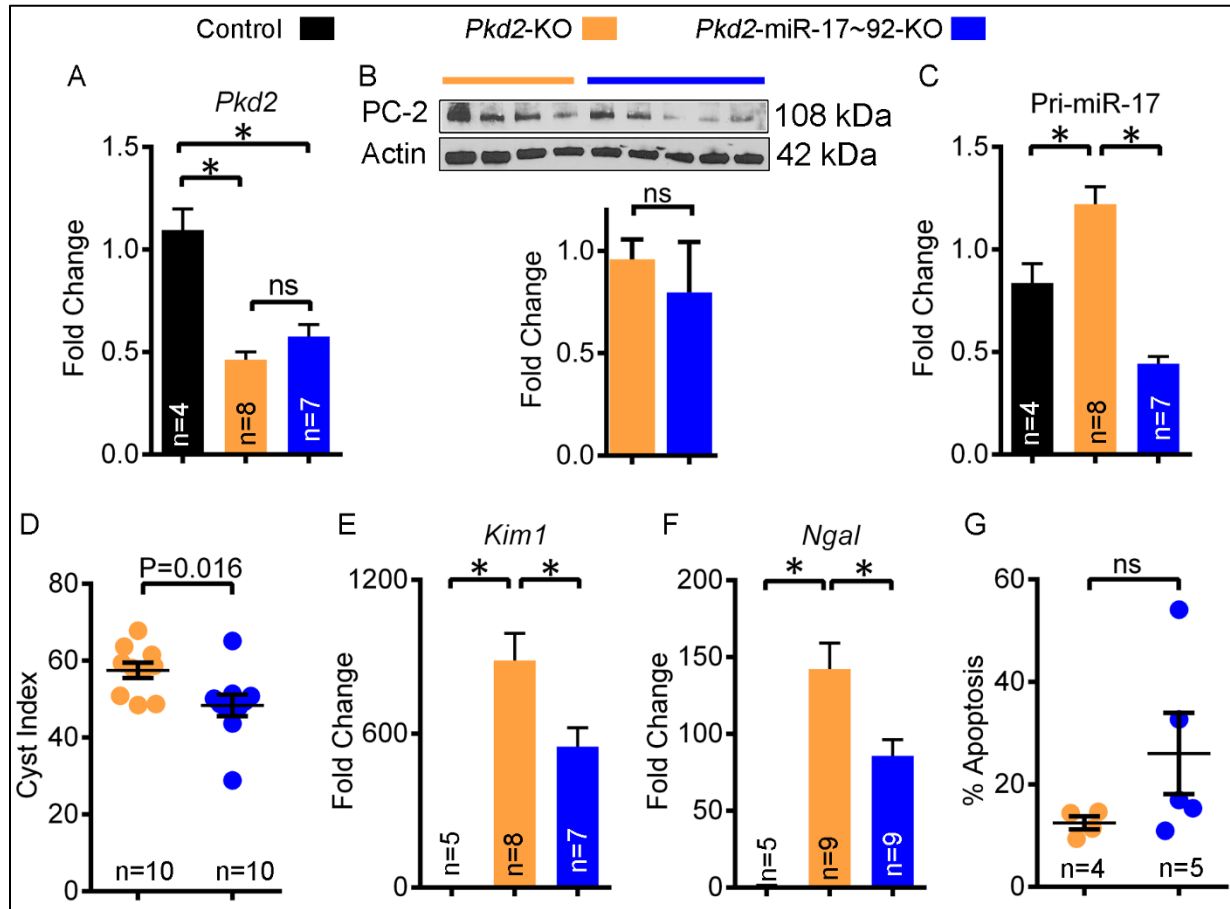

**Supplementary Figure 2:** To test the role of miR-17~92 in an orthologous genetic model of ADPKD bearing mutations in *Pkd2*, we generated *Pkhd1/Cre;Pkd2<sup>F/F</sup>* (*Pkd2*-KO) and *Pkhd1/Cre;Pkd2;miR-17~92<sup>F/F</sup>* (*Pkd2*-miR-17~92KO) mice. (A) Q-PCR analysis revealed that, compared to control kidneys (black), *Pkd2* expression was equally reduced in both *Pkd2*-KO (orange) and *Pkd2*-miR-17~92KO (blue) kidneys, indicating that a similar level of *Cre/loxP* recombination was observed. (B) Western Blot analysis and quantification of Polycystin-2 (PC-2) expression in *Pkd2*-KO and *Pkd2*-miR-17~92KO kidneys is shown. miR-17 deletion did not affect PC-2 expression in *Pkd2*-miR-17~92KO kidneys. (C) Q-PCR analysis revealed that, compared to control kidneys, miR-17 expression was increased in *Pkd2*-KO kidneys, whereas its expression was reduced by ~60% in *Pkd2*-miR-17~92KO mice. (D) Cyst index and the expression of kidney injury markers (E) *Kim1* and (F) *Ngal* was reduced in *Pkd2*-miR-17~92KO compared to *Pkd2*-KO kidneys. (G) The number of cyst epithelia undergoing apoptosis was higher in *Pkd2*-miR-17~92KO compared to *Pkd2*-KO kidneys. However, this difference was not statistically significant. Error bars indicate SEM. \* indicates  $P < 0.05$ , ns indicates  $P > 0.05$ . . One-way ANOVA, Tukey's multiple comparisons test (A, C, E, F), Student's unpaired *t*-test (B, D, G)

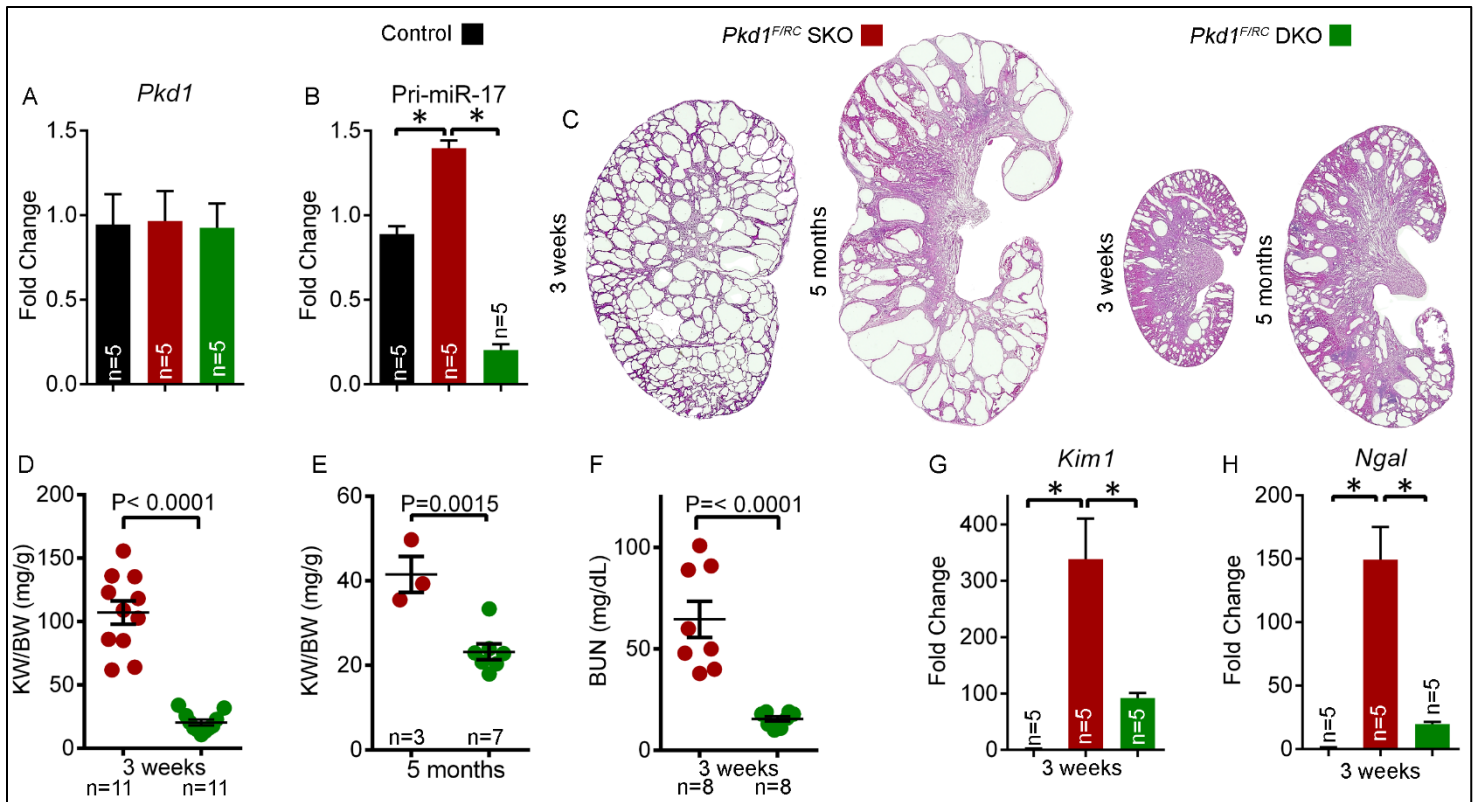

**Supplementary Figure 3:** To test the role of miR-17~92 in a long-lived ADPKD model, we generated *Ksp/Cre;Pkd1<sup>Flox/RC</sup>* (*Pkd1<sup>F/RC</sup>SKO*) and *Ksp/Cre;Pkd1<sup>Flox/RC</sup>;miR-17~92<sup>F/F</sup>* (*Pkd1<sup>F/RC</sup>DKO*) mice. This compound *Pkd1*-mutant mouse harbors a germline hypomorphic mutation on one allele and a *Cre/loxP* recombination-induced, renal tubule-specific, somatic null mutation on the other allele. (A) Q-PCR analysis revealed that *Pkd1* expression was not different between control (black), *Pkd1<sup>F/RC</sup>SKO* (red) and *Pkd1<sup>F/RC</sup>DKO* (green) kidneys, suggesting that deleting one floxed allele does not affect the total *Pkd1* mRNA expression. (B) In contrast, Q-PCR analysis revealed that, compared to control kidneys, miR-17 expression was increased in *Pkd1<sup>F/RC</sup>SKO* kidneys, whereas its expression was reduced by ~80% in *Pkd1<sup>F/RC</sup>DKO* kidneys. (C) H&E staining of kidney sections from three-week-old and five-month-old *Pkd1<sup>F/RC</sup>SKO* and *Pkd1<sup>F/RC</sup>DKO* mice is shown. (D&E) Kidney-weight-to-body-weight (KW/BW) ratio, (F) blood urea nitrogen (BUN) level and the expression of (G) *Kim1* and (H) *Ngal* was reduced in *Pkd1<sup>F/RC</sup>DKO* compared to *Pkd1<sup>F/RC</sup>SKO* mice. Thus, deletion of miR-17~92 markedly attenuates disease progression in *Ksp/Cre;Pkd1<sup>Flox/RC</sup>* mice. Error bars indicate SEM. \* indicates P<0.05, ns indicates P>0.05. One-way ANOVA, Tukey's multiple comparisons test (A, B, G, H), Student's unpaired *t*-test (D, E, F)

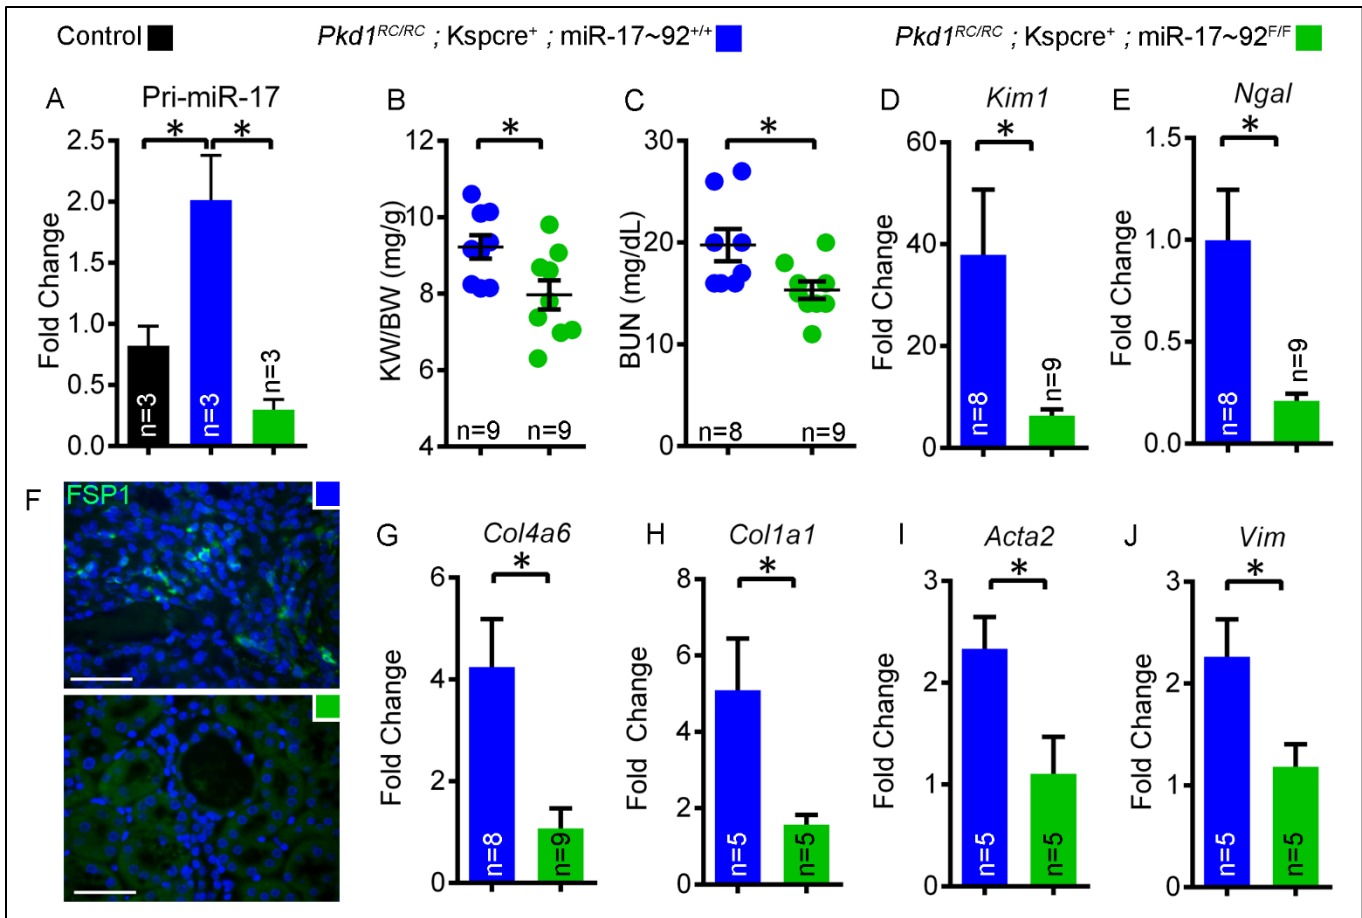

**Supplementary Figure 4:** To test the role of miR-17~92 in a slow cyst growth ADPKD model, we generated and characterized 6-month-old *Pkd1<sup>RC/RC</sup>; Ksp/Cre* (*Pkd1<sup>RC/RC</sup>*) and *Pkd1<sup>RC/RC</sup>; Ksp/Cre;miR-17~92<sup>F/F</sup>* mice (*Pkd1<sup>RC/RC</sup>DKO*). Unlike the preceding three ADPKD models, *Cre/loxP* recombination is not required to induce *Pkd1* mutation, and these mice develop significant renal fibrosis. *Ksp/Cre* was introduced into the cross to delete miR-17~92. (A) Q-PCR analysis revealed that, compared to control kidneys, miR-17 expression was increased in *Pkd1<sup>RC/RC</sup>* kidneys, whereas its expression was reduced in *Pkd1<sup>RC/RC</sup>DKO* compared to *Pkd1<sup>RC/RC</sup>* mice. (B) Kidney-weight-to-body-weight ratio, (C) BUN and the expression of (D) *Kim1* and (E) *Ngal* was decreased in *Pkd1<sup>RC/RC</sup>DKO* compared to *Pkd1<sup>RC/RC</sup>* mice. (F) Kidney sections were stained with an antibody against Fsp1 (fibroblast-specific protein 1). Fsp1 expression (green) was decreased in *Pkd1<sup>RC/RC</sup>DKO* kidneys compared to *Pkd1<sup>RC/RC</sup>* kidneys. (G-J) Q-PCR analysis showed that the expression of other fibrosis markers (*Col4a6*, *Col1a1*, *Acta2*, and *Vimentin*) was also decreased in *Pkd1<sup>RC/RC</sup>DKO* kidneys compared to *Pkd1<sup>RC/RC</sup>* kidneys. Collectively, these results indicate that miR-17~92 deletion attenuates disease progression in *Pkd1<sup>RC/RC</sup>* mice. Error bars indicate SEM. \* indicates P<0.05, ns indicates P>0.05. One-way ANOVA, Tukey's multiple comparisons test (A) Student's unpaired *t*-test (B-J). Scale Bar: 50  $\mu$ m.

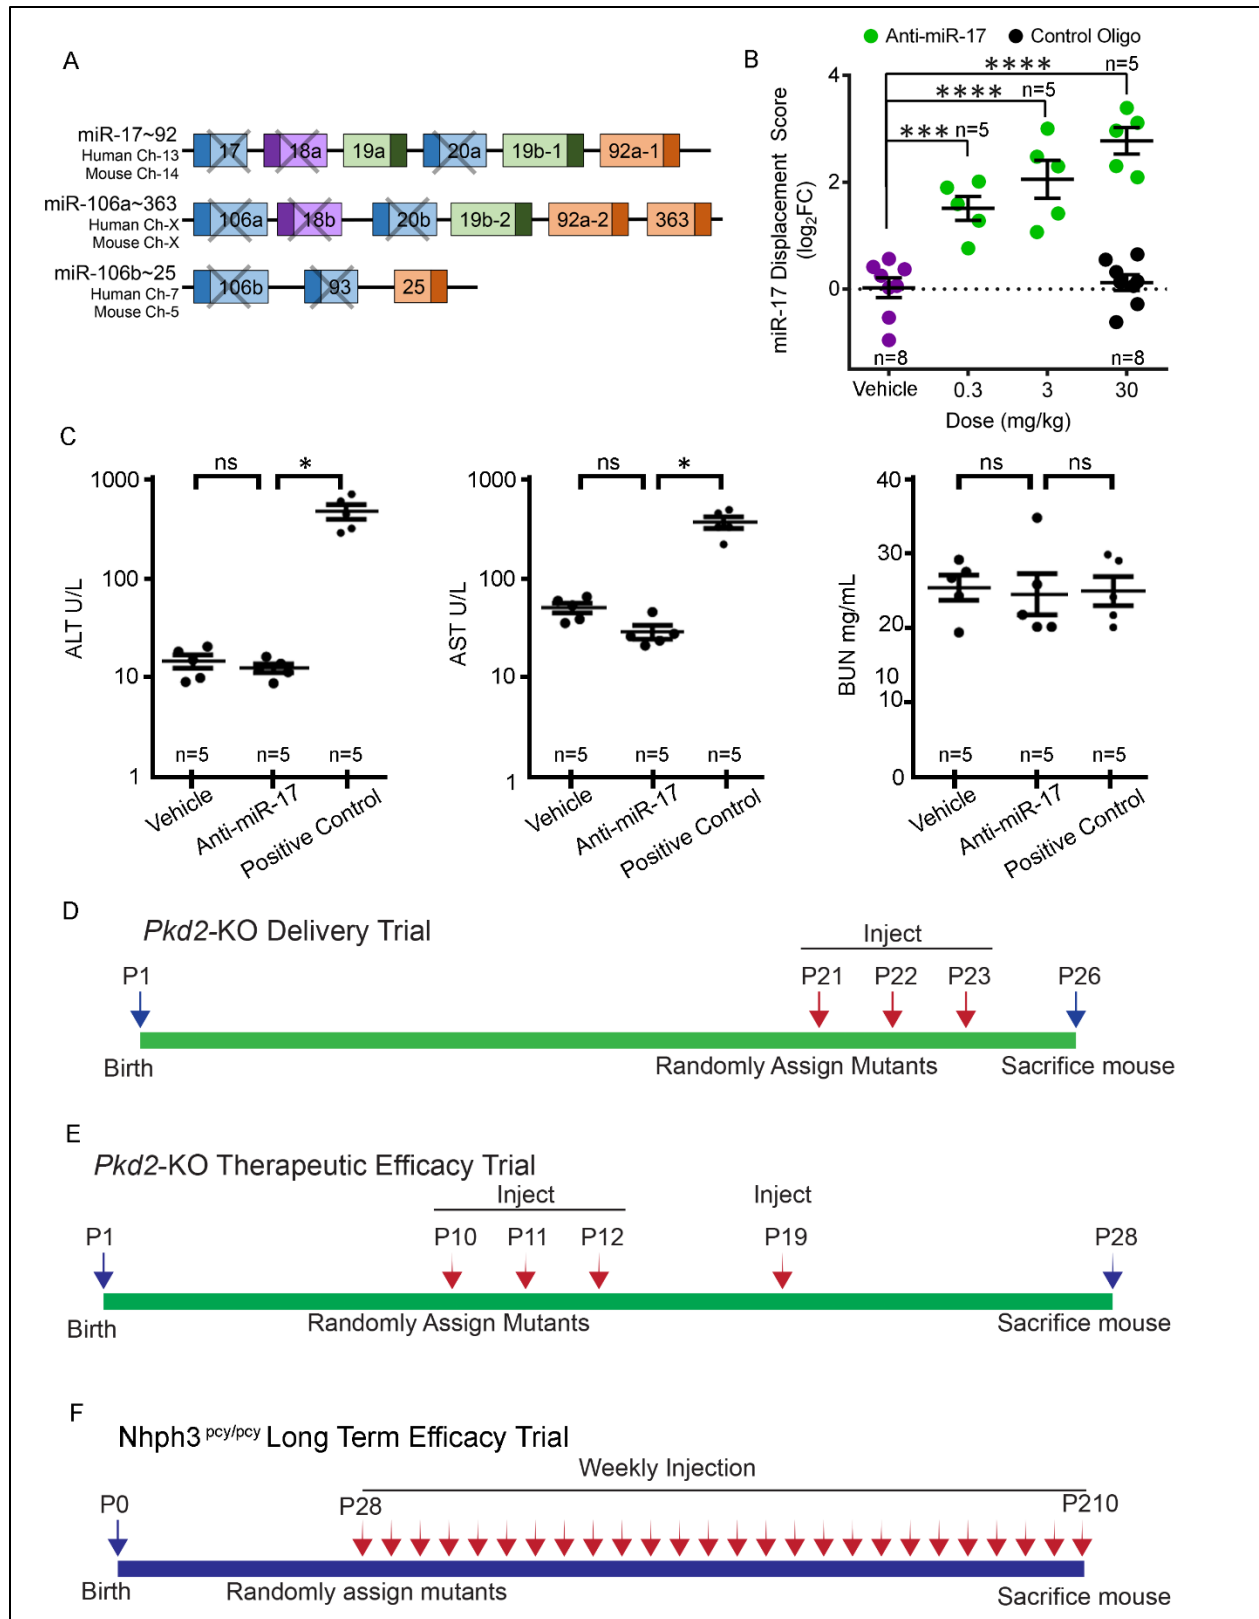

**Supplementary Figure 5:** (A) Genomic organization of the miR-17~92 and its paralogous clusters miR-106a~363 and miR-106b~25 is shown. Collectively, these three miRNA clusters encode miRNAs that belong to either the miR-17 (blue), miR-19 (green), miR-18 (purple) or miR-25 (orange) miRNA families. We have previously shown that our anti-miR-17 compound inhibits miRNAs that are marked with an 'X' in cultured cells. (B) The ability of this compound to inhibit miR-17 *in vivo* was measured using the miRNA polysome shift assay (miPSA)<sup>1</sup>. Normal mice were treated with a single subcutaneous dose of vehicle (PBS), anti-miR-17 (0.3, 3 or 30 mg per kg dose) or control oligonucleotide (30 mg per kg dose), and kidneys were harvested 7-days later (n=5-7 each group and dose). miR-17 fraction (normalized to let-7d) in high molecular weight (HMW) was measured by Q-PCR. miR-17 was displaced from HMW polysomes in kidneys of mice injected with anti-miR-17 in a dose-dependent manner. Similar miR-17 displacement was not observed in mice treated with vehicle or a control oligonucleotide. (C) Normal adult mice were injected with 300 mg per kg dose of anti-miR-17, vehicle or a control oligonucleotide known to produce liver toxicity (positive control). Measurement of the liver (ALT and AST) and kidney function (BUN) showed that anti-miR-17 does not produce acute liver or kidney toxicity. (D-F) The design of the delivery and therapeutic efficacy trials are shown. Error bars indicate SEM. \* indicates P<0.05, ns indicates P>0.05. One-way ANOVA, Tukey's multiple comparisons test (B) Student's unpaired *t*-test (C)

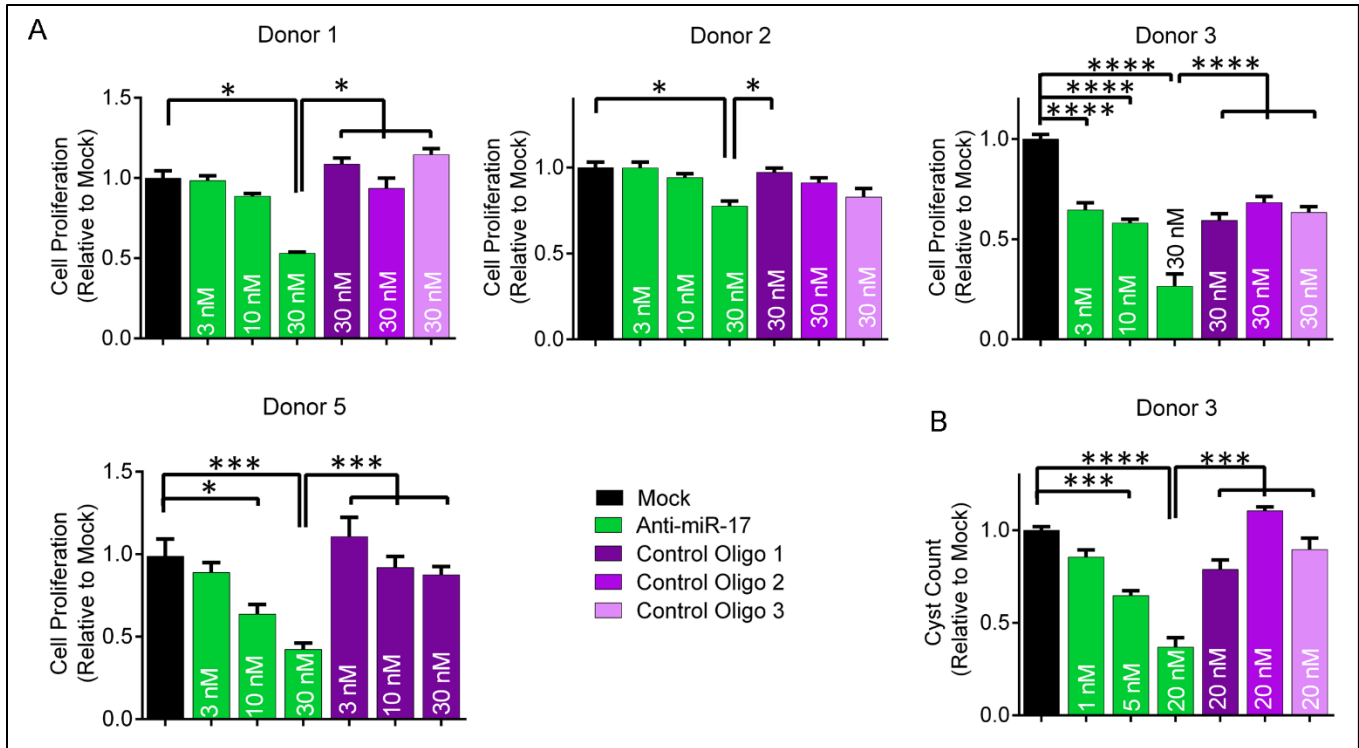

**Supplementary Figure 6:** Primary cyst epithelial cultures derived from kidneys of ADPKD patients were transfected with anti-miR-17 (dose: 3 nM, 10 nM or 30 nM) or three different control oligonucleotides (dose: 30 nM, control oligo1, 2 and 3) or mock-transfected. These cells were then cultured to measure proliferation and *in-vitro* cyst formation. (A) Data for proliferation (n=5 for each treatment and dose) using primary cultures derived from ADPKD Donor1, 2, 3 and 5. (B) *In-vitro* cyst formation (n=3 for each treatment and dose) using primary cultures derived from ADPKD Donor 3. Anti-miR-17 reduced cell viability and cyst count in a dose-dependent manner. Error bars indicate SEM. \*indicates P<0.05, \*\*indicates ns indicates P<0.01, \*\*\*indicates ns indicates P<0.005, and \*\*\*\*indicates P<0.001. One-way ANOVA, Tukey's multiple comparisons test

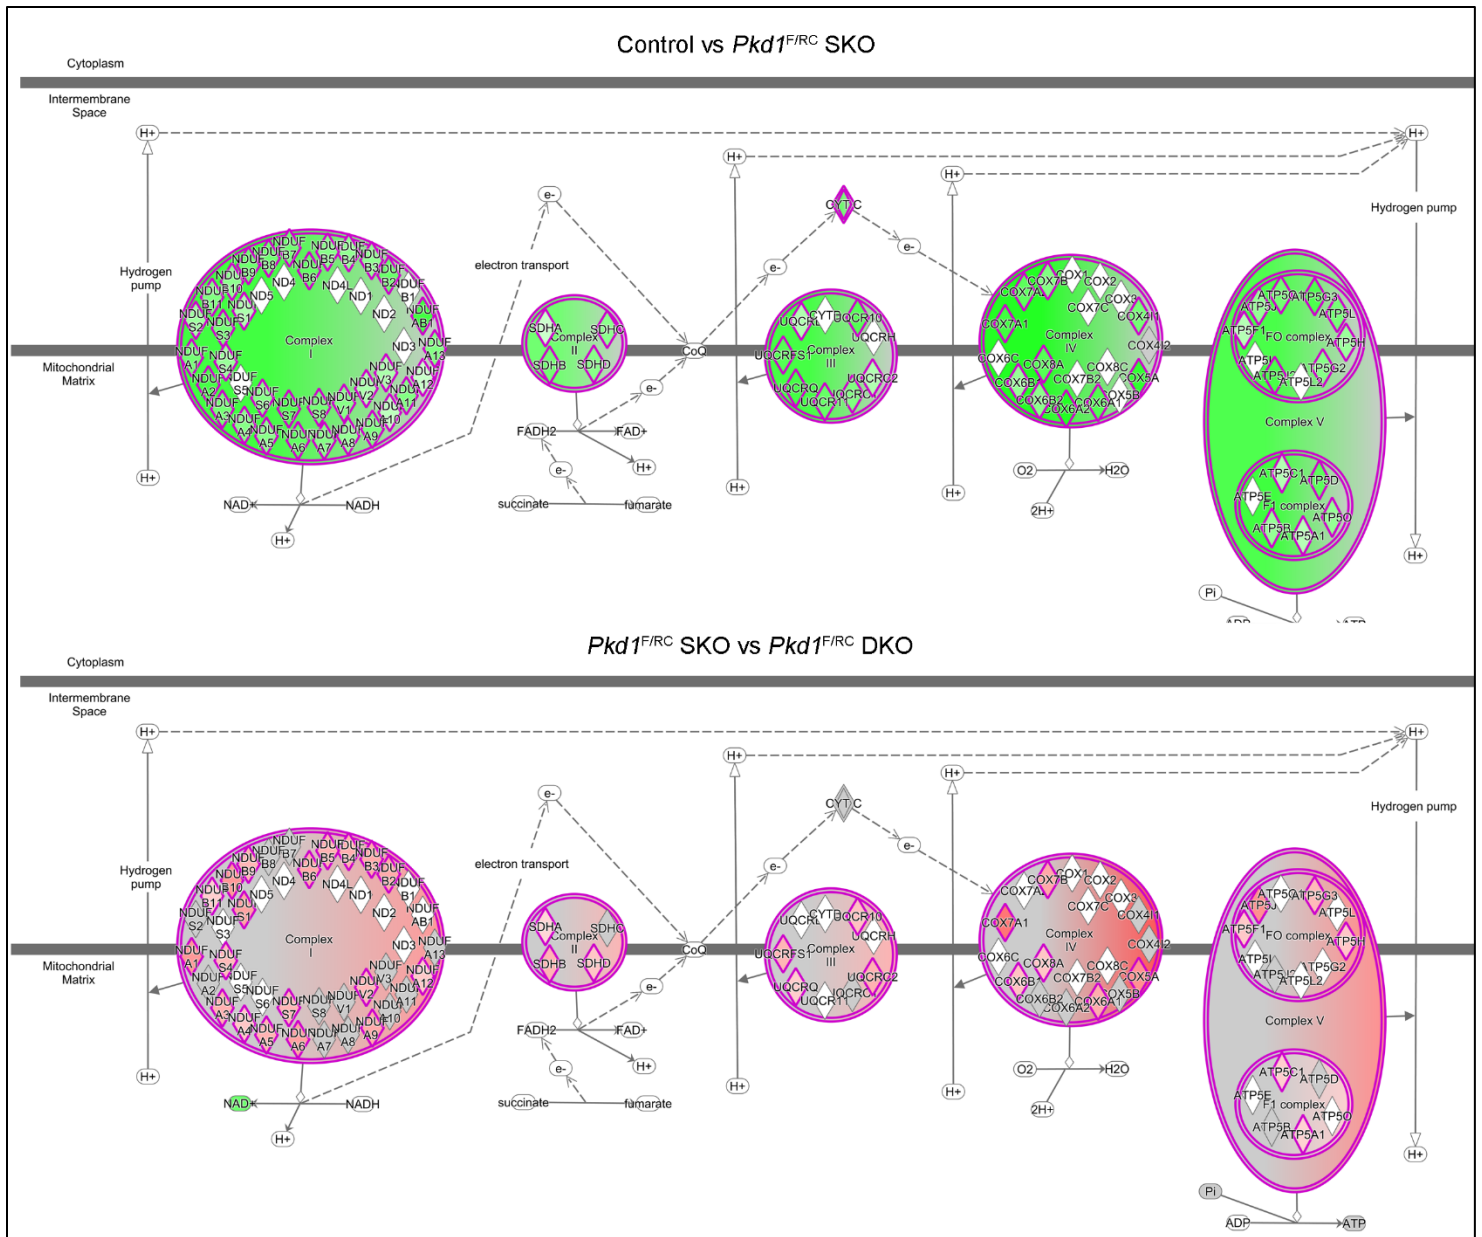

**Supplementary Figure 7:** RNA-Seq analysis was performed to compare mRNA expression profiles between kidneys of 21-day-old control, *Pkd1*<sup>F/RC</sup>SKO and *Pkd1*<sup>F/RC</sup>DKO mice (n=3). The differentially expressed genes (P<0.05, FDR<0.1) were further analyzed using the Ingenuity Pathway Analysis (IPA) software. Several mitochondrial pathways were differentially expressed. In particular, the oxidative phosphorylation pathway (shown above) was downregulated in *Pkd1*<sup>F/RC</sup>SKO compared to control kidneys. In contrast, this pathway was upregulated in *Pkd1*<sup>F/RC</sup>DKO compared to *Pkd1*<sup>F/RC</sup>SKO kidneys. Green indicates downregulated genes, whereas red indicates upregulated genes.



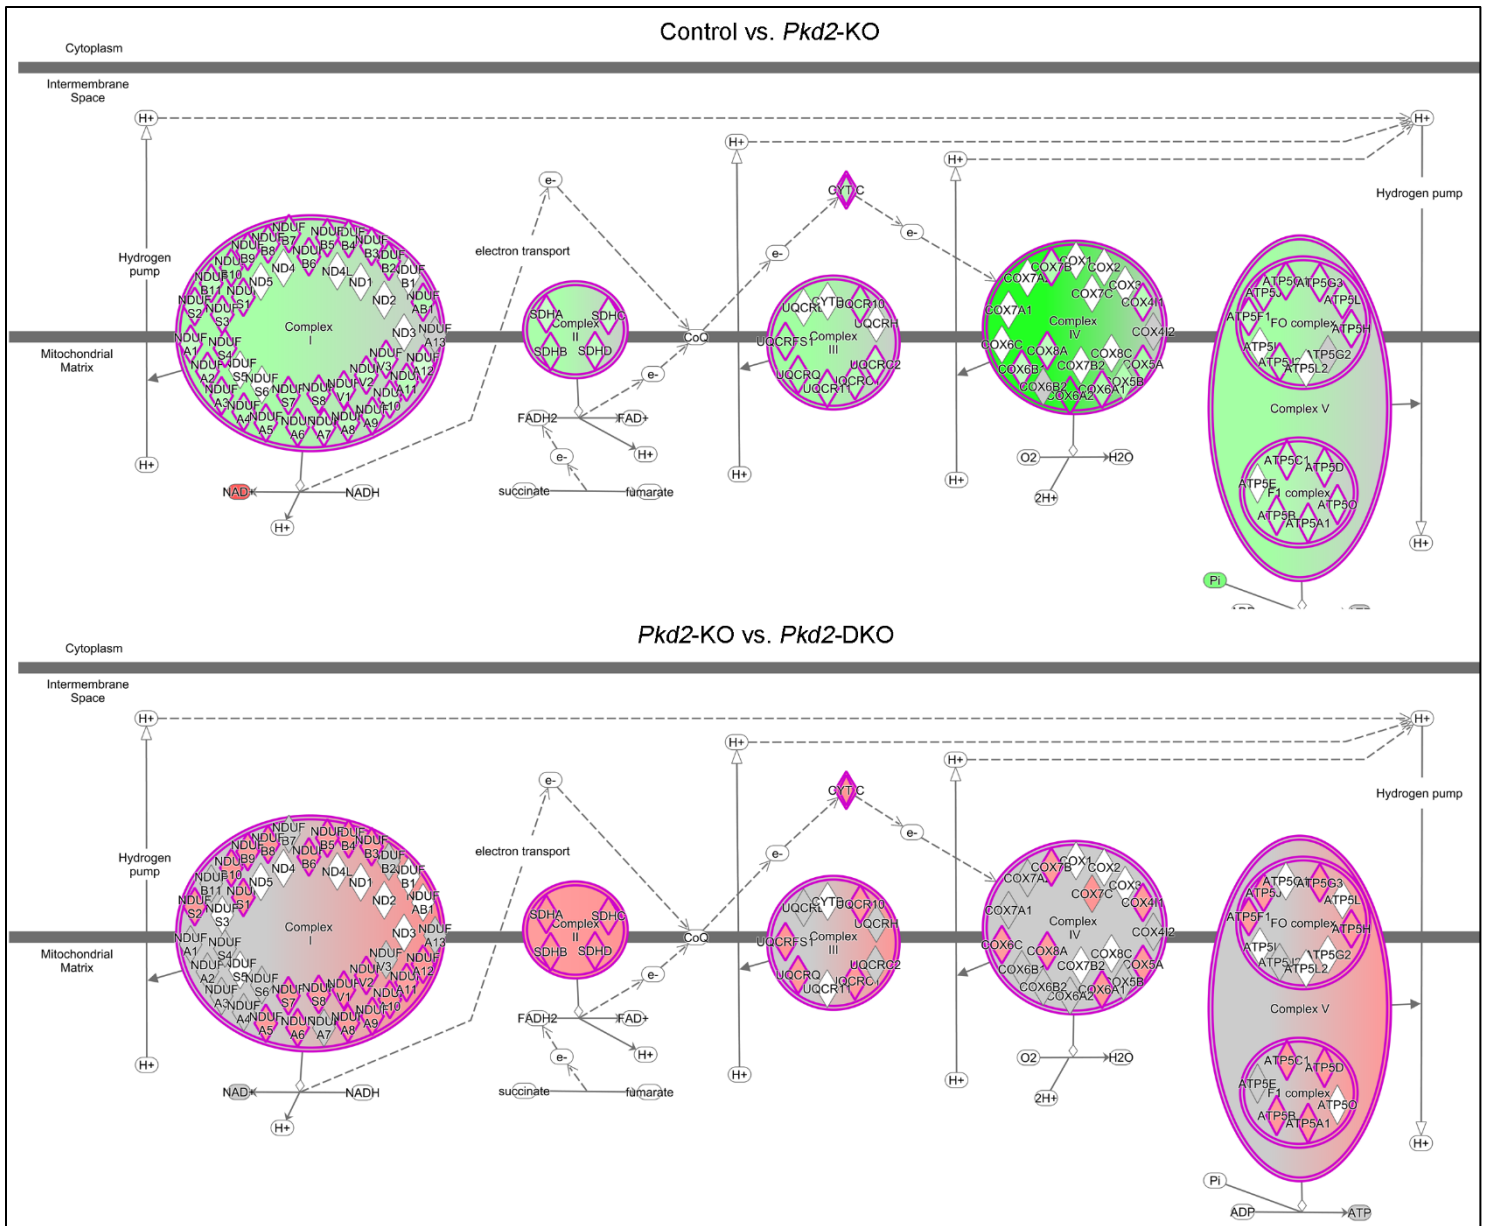

**Supplementary Figure 8:** RNA-Seq analysis was performed to compare mRNA expression profiles between kidneys of 21-day-old control, *Pkd2*-KO and *Pkd2*-miR-17~92KO mice (n=5). The differentially expressed genes ( $P < 0.05$ ,  $FDR < 0.1$ ) were further analyzed using the Ingenuity Pathway Analysis (IPA) software. Similar to the *Pkd1*-mutant mice, several mitochondrial pathways were differentially expressed. The oxidative phosphorylation pathway (shown above) was downregulated in *Pkd2*-KO compared to control kidneys. In contrast, this pathway was upregulated in *Pkd2*-miR-17~92KO compared to *Pkd2*-KO kidneys. Green indicates downregulated genes, whereas red indicates upregulated genes.

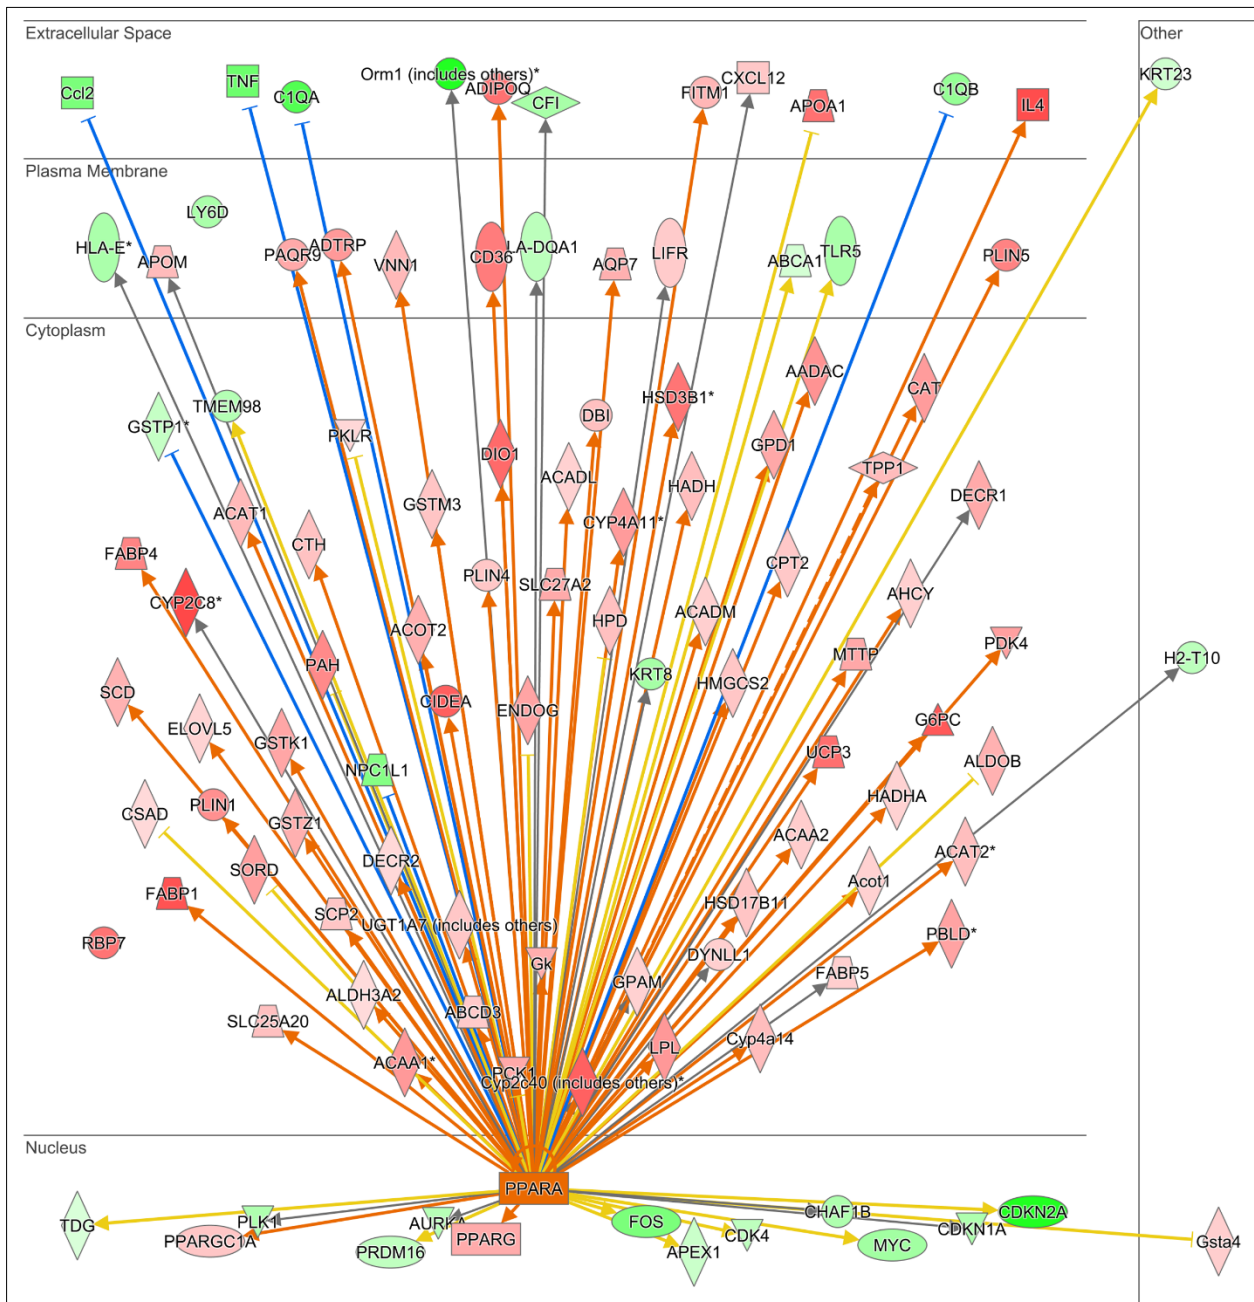

**Supplementary Figure 9:** RNA-Seq analysis was performed to compare mRNA expression profiles between kidneys of 21-day-old control, *Pkd1*<sup>F/RC</sup>SKO and *Pkd1*<sup>F/RC</sup>DKO mice (n=3). The differentially expressed genes (P<0.05, FDR<0.1) were further analyzed using the Ingenuity Pathway Analysis (IPA) software to identify the upstream regulators that may be responsible for the gene expression changes observed after miR-17~92 deletion. PPARA-regulated gene network was predicted to be robustly activated after miR-17~92 deletion. Accordingly, a large number of direct PPARA targets (shown above) were upregulated in *Pkd1*<sup>F/RC</sup>DKO compared to *Pkd1*<sup>F/RC</sup>SKO kidneys. Green indicates downregulated genes, whereas red indicates upregulated genes.



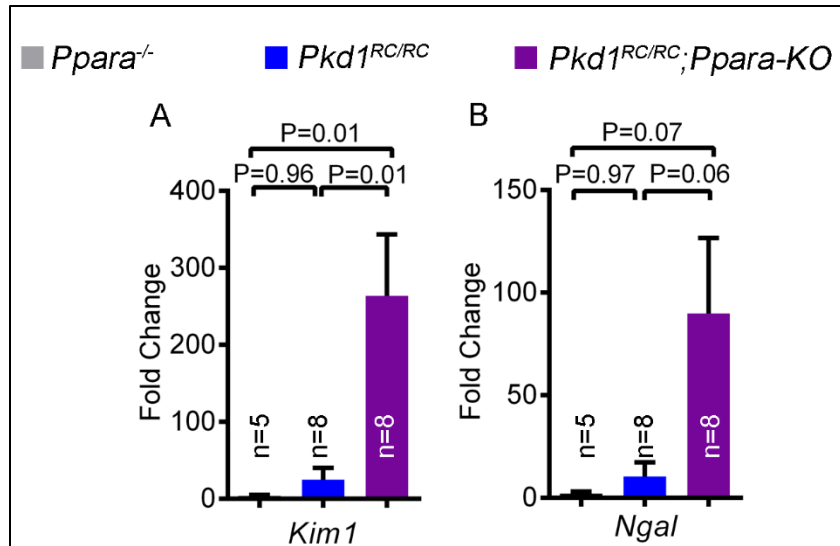

**Supplementary Figure 11:** To test whether reduced *Ppara* gene dosage is sufficient to enhance proliferation and promote cyst formation, 6-week old *Ppara*<sup>-/-</sup>, *Pkd1*<sup>RC/RC</sup>, and *Pkd1*<sup>RC/RC</sup>; *Ppara*-KO mice were characterized. Q-PCR analysis (A) *Kim1* and (B) *Ngal* in the indicated mouse models is shown. Error bars indicate SEM. Multiplicity adjusted P values using Tukey's multiple comparison test are shown.

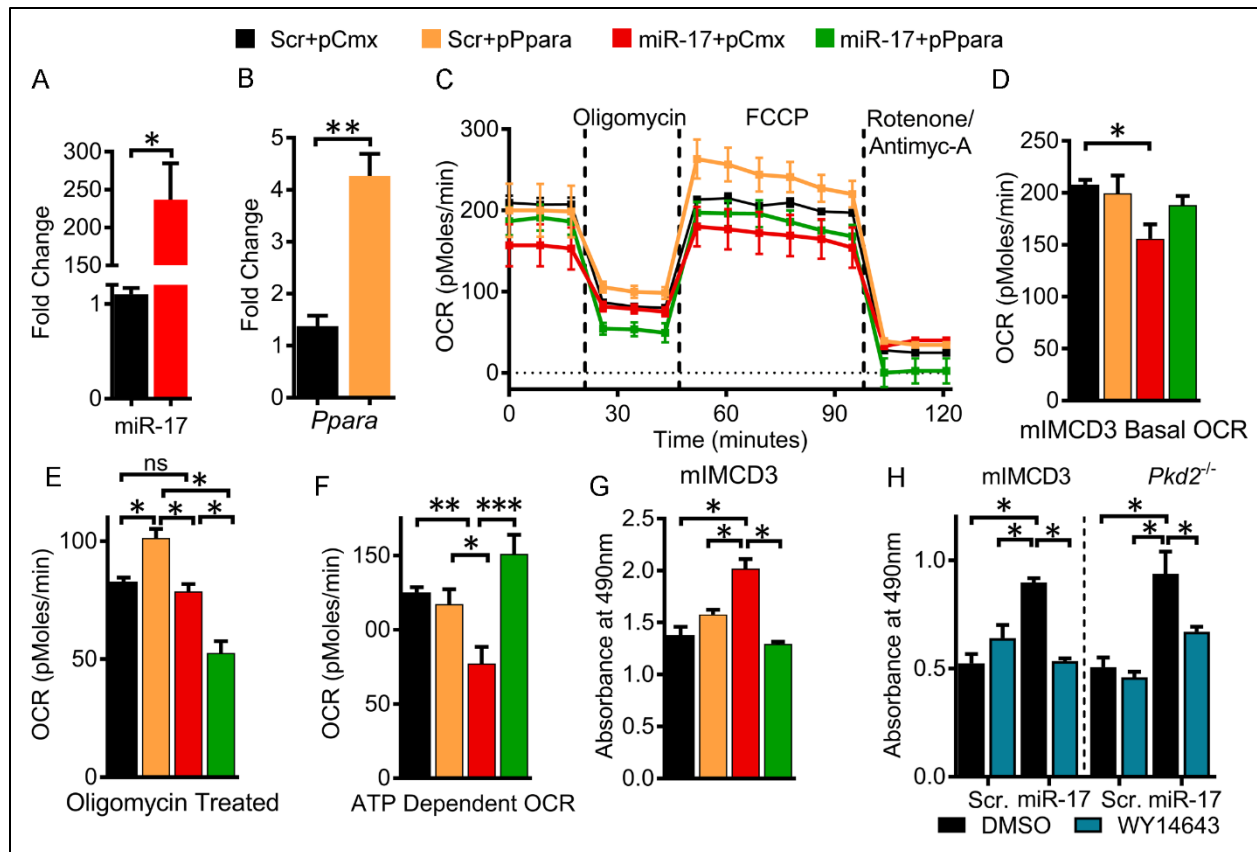

**Supplementary Figure 12:** Characterization of cultured cells transfected with (A) miR-17 mimics and (B) PPARA-expressing plasmid (pPpara) is shown. To determine whether miR-17 affects OXPHOS, *Seahorse* XF 24 Analyzer was used to measure real-time mitochondrial oxygen consumption rate (OCR) of renal epithelial cells. (C) Real-time OCR tracings, (D) Basal OCR, (E) Oligomycin-treated OCR, and (F) ATP-dependent OCR of indicated cell lines is shown. ATP-dependent OCR was reduced in mIMCD3 cells treated with miR-17 mimics compared to scramble mimics. Reexpression of *Ppara* prevented miR-17-induced reductions in ATP-dependent OCR. (G&H) MTT assay was used to determine whether increased *Ppara* gene dosage inhibits miR-17-stimulated proliferation of renal epithelia. Treatment with miR-17 mimic increased proliferation of mIMCD3 cells. (G) Transfection with a *Ppara*-expressing plasmid (pPpara) reduced miR-17-stimulated proliferation whereas transfection with a control plasmid (pCMX) had no effect (n=3 biological replicates with three technical replicates). (H) Treatment with WY14643, a PPARA agonist, also reduced miR-17-stimulated proliferation whereas treatment with DMSO had no effect (n=3 biological replicates with three technical replicates). miR-17 mimic also increased proliferation of *Pkd2*<sup>-/-</sup> kidney epithelia. Similar to mIMCD3 cells, WY14643 reduced miR-17-stimulated proliferation of *Pkd2*<sup>-/-</sup> cells whereas treatment with DMSO had no effect (n=3 biological replicates with three technical replicates). One-way ANOVA, Tukey's multiple comparisons test (D-H) Student's unpaired *t*-test (A, B)

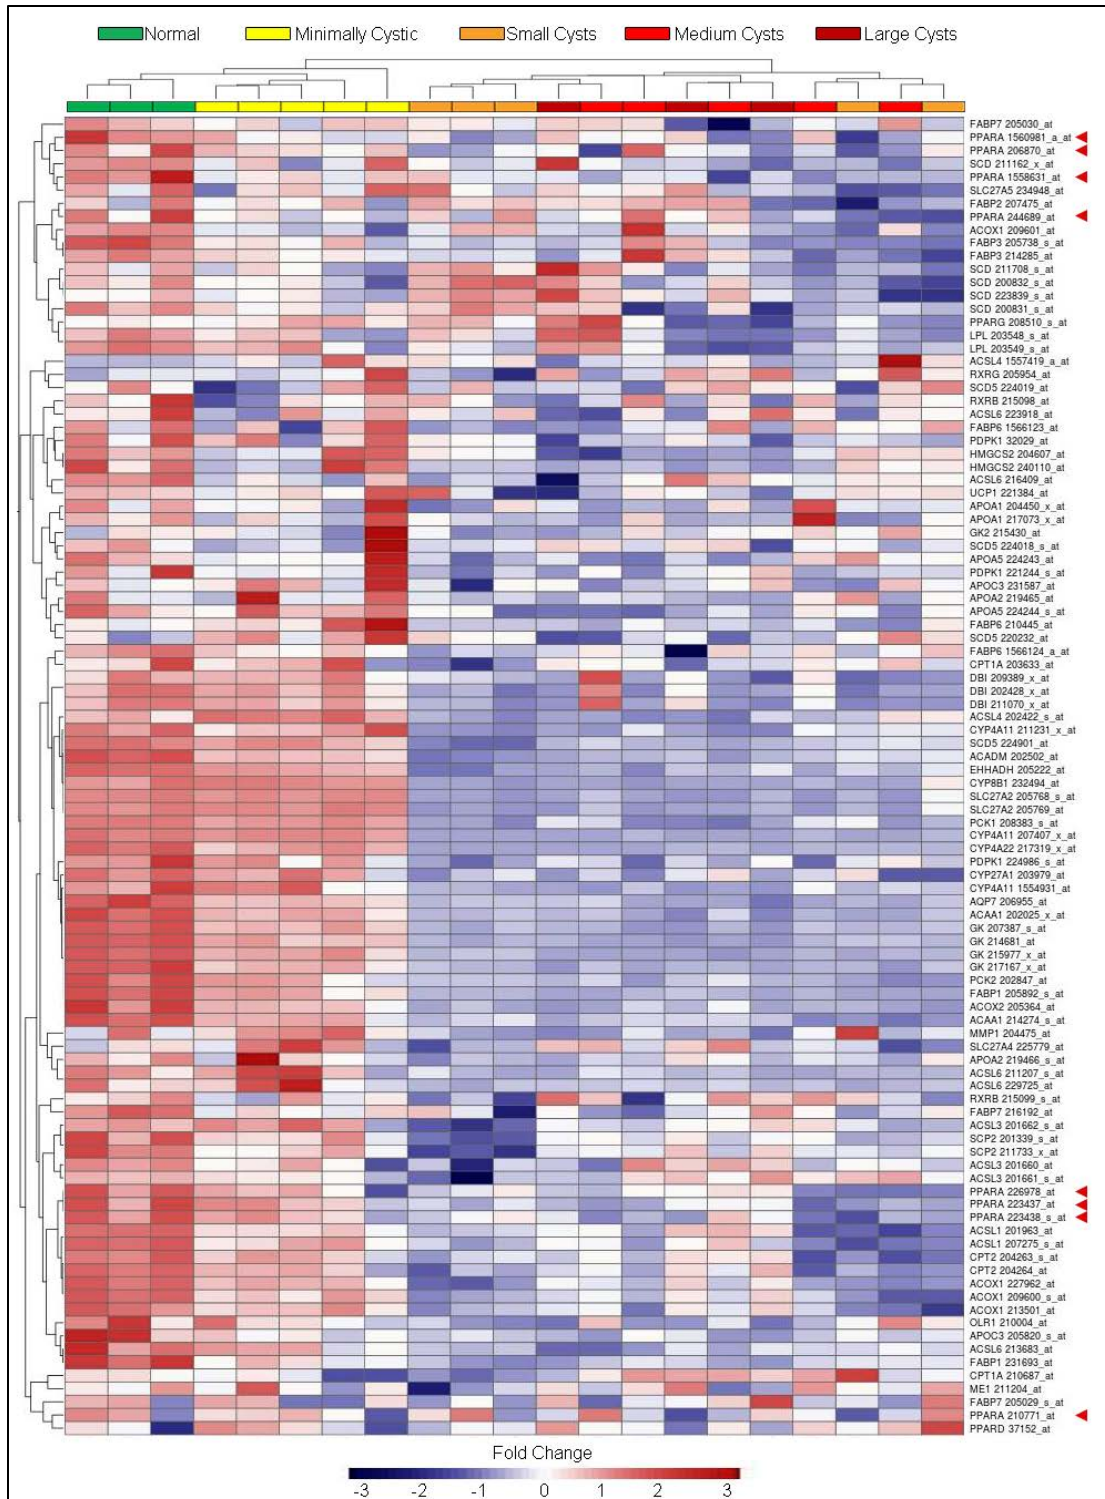

**Supplementary Figure 13:** Song *et al*<sup>2</sup>, have previously performed cDNA microarrays (Human Genome U133 Plus 2.0 Array, Affymetrix) using RNA from three normal renal cortical samples, five minimally cystic ADPKD tissue samples and 13 ADPKD cysts of varying sizes (small, medium, and large). Analysis of this publically-available data (<http://rged.wall-eva.net/>) revealed that *PPARA* (red arrow heads) and its targets are downregulated in human ADPKD cysts.

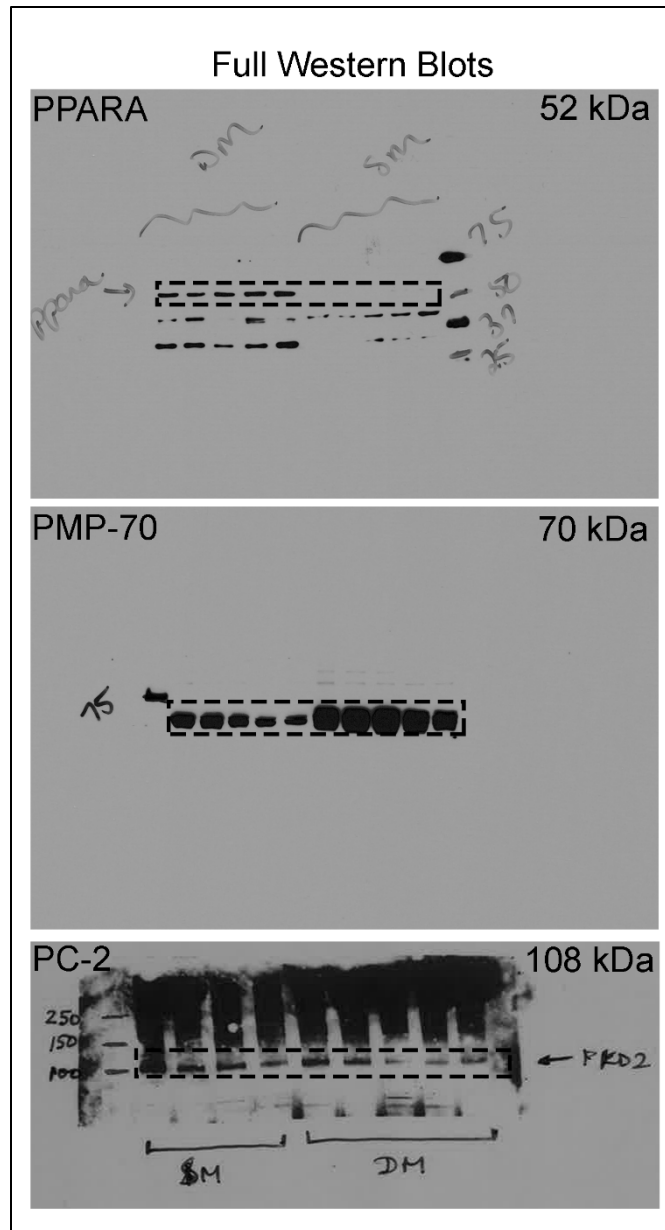

**Supplementary Figure 14:** The full, original Western blots are shown accompanied with indicated protein name (top left) and molecular weight (top right).

Supplementary Table 1: Differential expression of miRNAs in ADPKD models

| miRNA                   | Pkd1-KO vs. Control |             |         |         | Pkd2-KO vs. Control |             |         |         |
|-------------------------|---------------------|-------------|---------|---------|---------------------|-------------|---------|---------|
|                         | P10 AvgExp          | Fold-change | P-value | FDR     | P21 AvgExp          | Fold-change | P-value | FDR     |
| mmu-miR-29a             | 9.57                | 2.73        | 1.5E-05 | 0.00403 | 11.66               | 1.20        | 8.4E-02 | 0.37106 |
| mmu-miR-126-3p          | 14.57               | 0.64        | 2.1E-05 | 0.00403 | 14.54               | 0.75        | 2.6E-04 | 0.00742 |
| mmu-miR-200c            | 10.35               | 1.77        | 2.8E-05 | 0.00403 | 10.35               | 1.65        | 1.9E-03 | 0.02635 |
| mmu-miR-96              | 9.83                | 3.91        | 3.0E-05 | 0.00403 | 9.44                | 5.54        | 2.4E-05 | 0.00182 |
| mmu-miR-182             | 3.29                | 59.71       | 4.4E-05 | 0.00469 | 3.03                | 66.41       | 3.7E-06 | 0.00050 |
| mmu-let-7g              | 13.35               | 0.81        | 6.0E-05 | 0.00524 | 13.46               | 0.82        | 5.5E-03 | 0.05630 |
| mmu-miR-20a/b           | 12.20               | 1.23        | 6.8E-05 | 0.00524 | 11.43               | 1.51        | 8.2E-04 | 0.01637 |
| mmu-miR-218             | 9.98                | 1.59        | 8.2E-05 | 0.00553 | 9.33                | 1.01        | 9.1E-01 | 1.00000 |
| mmu-miR-183             | 8.28                | 4.80        | 9.7E-05 | 0.00578 | 7.81                | 3.88        | 1.4E-04 | 0.00454 |
| mmu-miR-192             | 9.40                | 0.38        | 1.3E-04 | 0.00676 | 10.57               | 0.56        | 1.3E-03 | 0.01998 |
| mmu-miR-204             | 9.96                | 0.44        | 1.8E-04 | 0.00856 | 10.24               | 0.66        | 2.0E-04 | 0.00608 |
| mmu-miR-21              | 12.59               | 2.85        | 2.0E-04 | 0.00856 | 12.90               | 4.67        | 3.7E-06 | 0.00050 |
| mmu-miR-196b            | 11.35               | 0.81        | 2.1E-04 | 0.00856 | 10.60               | 0.86        | 5.0E-02 | 0.26058 |
| mmu-miR-194             | 9.86                | 0.40        | 2.7E-04 | 0.01041 | 10.74               | 0.64        | 2.2E-02 | 0.14702 |
| mmu-let-7i              | 13.11               | 1.56        | 3.4E-04 | 0.01232 | 12.68               | 1.76        | 5.0E-05 | 0.00268 |
| mmu-miR-199a-5p         | 12.49               | 1.35        | 3.7E-04 | 0.01257 | 10.87               | 2.54        | 9.1E-08 | 0.00005 |
| mmu-miR-29b             | 7.27                | 2.83        | 4.1E-04 | 0.01289 | 9.66                | 1.37        | 2.0E-01 | 0.61661 |
| mmu-miR-30e             | 10.21               | 0.64        | 4.6E-04 | 0.01375 | 10.68               | 0.61        | 2.7E-05 | 0.00182 |
| mmu-miR-221             | 8.43                | 1.47        | 6.9E-04 | 0.01939 | 8.51                | 1.11        | 1.9E-01 | 0.59419 |
| mmu-miR-100             | 9.53                | 1.35        | 7.6E-04 | 0.01943 | 8.89                | 1.43        | 2.3E-03 | 0.02940 |
| mmu-miR-378             | 9.58                | 0.73        | 7.6E-04 | 0.01943 | 10.42               | 0.67        | 3.5E-03 | 0.03950 |
| mmu-miR-223             | 7.48                | 2.54        | 8.0E-04 | 0.01964 | 7.99                | 4.16        | 7.1E-06 | 0.00076 |
| mmu-miR-126-5p          | 10.56               | 0.70        | 9.0E-04 | 0.02103 | 10.59               | 0.78        | 1.2E-03 | 0.01951 |
| mmu-miR-26b             | 10.10               | 0.71        | 1.4E-03 | 0.03028 | 10.35               | 0.76        | 8.1E-05 | 0.00335 |
| mmu-miR-143             | 11.94               | 1.33        | 1.5E-03 | 0.03211 | 11.62               | 1.32        | 5.7E-02 | 0.28601 |
| mmu-miR-199a-3p         | 12.68               | 1.28        | 1.6E-03 | 0.03384 | 11.23               | 2.84        | 1.4E-06 | 0.00038 |
| mmu-miR-30c             | 12.78               | 0.67        | 1.7E-03 | 0.03425 | 13.00               | 0.64        | 2.6E-05 | 0.00182 |
| mmu-miR-106a+mmu-miR-17 | 11.67               | 1.21        | 1.9E-03 | 0.03616 | 10.89               | 1.45        | 1.4E-04 | 0.00454 |
| mmu-miR-351             | 6.50                | 2.22        | 2.5E-03 | 0.04499 | 3.60                | 0.43        | 1.9E-01 | 0.61071 |
| mmu-miR-362-5p          | 4.37                | 2.11        | 2.5E-03 | 0.04499 | 3.92                | 1.83        | 2.3E-01 | 0.70273 |
| mmu-miR-28              | 9.54                | 1.27        | 2.9E-03 | 0.04945 | 9.03                | 1.48        | 1.9E-03 | 0.02635 |
| mmu-miR-340-5p          | 10.06               | 0.86        | 2.9E-03 | 0.04945 | 9.53                | 0.98        | 7.5E-01 | 1.00000 |
| mmu-miR-151-5p          | 9.86                | 0.71        | 3.1E-03 | 0.04977 | 9.89                | 0.78        | 2.5E-02 | 0.15763 |
| mmu-miR-375             | 1.50                | 7.96        | 3.4E-03 | 0.05350 | 5.26                | 2.50        | 4.7E-03 | 0.04931 |
| mmu-miR-714             | 6.23                | 1.87        | 3.7E-03 | 0.05626 | 5.24                | 13.49       | 8.0E-02 | 0.36446 |
| mmu-miR-200a            | 11.43               | 0.76        | 4.0E-03 | 0.05921 | 11.90               | 0.81        | 1.4E-02 | 0.10825 |
| mmu-miR-148b            | 8.77                | 0.75        | 4.1E-03 | 0.05921 | 8.61                | 0.95        | 5.5E-01 | 1.00000 |
| mmu-miR-185             | 6.02                | 0.67        | 4.4E-03 | 0.06098 | 6.51                | 0.70        | 9.5E-02 | 0.38502 |
| mmu-miR-431             | 2.84                | 12.32       | 4.5E-03 | 0.06098 | 0.45                | 1.85        | 3.6E-01 | 0.73909 |
| mmu-miR-345-5p          | 6.39                | 0.73        | 4.5E-03 | 0.06098 | 6.41                | 0.72        | 2.9E-02 | 0.17547 |
| mmu-miR-1839-5p         | 7.39                | 0.72        | 5.6E-03 | 0.07323 | 7.17                | 0.63        | 1.1E-04 | 0.00427 |
| mmu-miR-196a            | 10.09               | 0.82        | 5.8E-03 | 0.07365 | 9.66                | 0.79        | 2.5E-02 | 0.15930 |
| mmu-miR-99a             | 10.82               | 0.63        | 5.9E-03 | 0.07365 | 10.86               | 0.74        | 2.9E-03 | 0.03403 |
| mmu-miR-350             | 8.20                | 0.75        | 6.7E-03 | 0.08141 | 7.76                | 1.72        | 8.7E-04 | 0.01670 |
| mmu-miR-532-5p          | 7.61                | 1.28        | 7.4E-03 | 0.08879 | 7.54                | 1.17        | 2.2E-02 | 0.14544 |
| mmu-miR-132             | 7.51                | 1.69        | 8.6E-03 | 0.10007 | 7.70                | 2.24        | 3.9E-04 | 0.00990 |
| mmu-miR-410             | 5.79                | 3.25        | 9.5E-03 | 0.10596 | 3.35                | 2.21        | 1.7E-01 | 0.55676 |
| mmu-miR-200b            | 11.94               | 0.85        | 9.7E-03 | 0.10596 | 12.08               | 0.83        | 5.6E-03 | 0.05688 |



|                 |       |      |         |         |       |       |         |         |
|-----------------|-------|------|---------|---------|-------|-------|---------|---------|
| mmu-miR-1951    | 6.91  | 1.21 | 9.7E-03 | 0.10596 | 7.18  | 1.15  | 7.8E-02 | 0.35893 |
| mmu-miR-188-5p  | 9.06  | 0.86 | 9.9E-03 | 0.10596 | 9.13  | 0.99  | 8.1E-01 | 1.00000 |
| mmu-miR-135a    | 6.68  | 0.48 | 1.0E-02 | 0.10931 | 5.12  | 1.07  | 3.1E-01 | 0.73909 |
| mmu-miR-150     | 8.04  | 0.53 | 1.1E-02 | 0.11236 | 8.93  | 1.04  | 8.6E-01 | 1.00000 |
| mmu-miR-195     | 5.77  | 0.67 | 1.1E-02 | 0.11244 | 6.48  | 1.04  | 7.6E-01 | 1.00000 |
| mmu-miR-301a    | 10.13 | 1.16 | 1.2E-02 | 0.11244 | 9.47  | 0.96  | 4.9E-02 | 0.25880 |
| mmu-miR-10b     | 11.76 | 1.15 | 1.2E-02 | 0.11244 | 11.12 | 1.15  | 9.3E-02 | 0.38502 |
| mmu-miR-434-3p  | 6.56  | 2.01 | 1.2E-02 | 0.11244 | 3.90  | 4.71  | 1.7E-01 | 0.55037 |
| mmu-miR-222     | 6.24  | 1.39 | 1.2E-02 | 0.11554 | 6.70  | 1.07  | 6.7E-01 | 1.00000 |
| mmu-miR-376b    | 5.61  | 2.31 | 1.2E-02 | 0.11554 | 3.07  | 4.45  | 1.5E-01 | 0.51487 |
| mmu-miR-329     | 5.68  | 2.53 | 1.3E-02 | 0.11864 | 2.54  | 10.06 | 1.5E-02 | 0.11251 |
| mmu-miR-140     | 8.88  | 0.76 | 1.4E-02 | 0.12447 | 9.11  | 0.84  | 2.1E-02 | 0.13969 |
| mmu-miR-9       | 9.13  | 1.42 | 1.4E-02 | 0.12544 | 9.09  | 2.32  | 1.5E-03 | 0.02339 |
| mmu-miR-26a     | 9.80  | 0.75 | 1.4E-02 | 0.12544 | 9.65  | 0.97  | 6.3E-01 | 1.00000 |
| mmu-miR-411     | 5.00  | 2.91 | 1.6E-02 | 0.13319 | 2.01  | 4.69  | 8.8E-02 | 0.38299 |
| mmu-miR-376c    | 6.02  | 3.10 | 1.6E-02 | 0.13446 | 4.01  | 2.19  | 9.2E-02 | 0.38502 |
| mmu-miR-23a     | 11.15 | 1.20 | 1.8E-02 | 0.14539 | 11.41 | 1.04  | 3.2E-01 | 0.73909 |
| mmu-miR-214     | 7.67  | 1.48 | 1.9E-02 | 0.15137 | 5.88  | 3.56  | 3.2E-03 | 0.03702 |
| mmu-miR-335-5p  | 9.16  | 0.66 | 1.9E-02 | 0.15461 | 7.22  | 0.64  | 8.5E-03 | 0.07274 |
| mmu-miR-181c    | 7.75  | 0.68 | 2.0E-02 | 0.15461 | 7.53  | 0.82  | 1.8E-02 | 0.12535 |
| mmu-miR-379     | 1.53  | 8.32 | 2.1E-02 | 0.16152 | 0.00  | 1.00  | 1.0E+00 | 1.00000 |
| mmu-miR-23b     | 11.21 | 0.81 | 2.1E-02 | 0.16152 | 11.55 | 0.78  | 6.8E-04 | 0.01468 |
| mmu-let-7d      | 13.71 | 0.96 | 2.1E-02 | 0.16152 | 13.47 | 0.91  | 3.8E-02 | 0.21030 |
| mmu-miR-127     | 6.63  | 2.69 | 2.3E-02 | 0.16809 | 4.74  | 2.60  | 8.2E-03 | 0.07178 |
| mmu-miR-101a    | 8.31  | 0.73 | 2.4E-02 | 0.17543 | 8.72  | 0.74  | 1.9E-03 | 0.02635 |
| mmu-miR-93      | 9.44  | 1.36 | 2.7E-02 | 0.19324 | 8.75  | 1.47  | 1.0E-03 | 0.01731 |
| mmu-let-7a      | 14.18 | 0.88 | 2.8E-02 | 0.20385 | 14.09 | 0.88  | 1.8E-02 | 0.12535 |
| mmu-miR-615-3p  | 4.55  | 0.46 | 3.1E-02 | 0.21785 | 3.42  | 1.27  | 5.6E-01 | 1.00000 |
| mmu-miR-708     | 5.29  | 0.57 | 3.2E-02 | 0.22232 | 2.45  | 0.35  | 1.5E-01 | 0.50663 |
| mmu-miR-1198    | 5.50  | 0.66 | 3.4E-02 | 0.23055 | 5.43  | 0.79  | 1.2E-01 | 0.44042 |
| mmu-miR-690     | 2.07  | 0.22 | 3.4E-02 | 0.23055 | 2.12  | 1.03  | 9.7E-01 | 1.00000 |
| mmu-miR-142-3p  | 8.87  | 1.68 | 3.6E-02 | 0.23959 | 9.67  | 4.69  | 6.0E-04 | 0.01412 |
| mmu-miR-125a-3p | 7.67  | 1.57 | 3.8E-02 | 0.24546 | 6.92  | 2.29  | 6.7E-02 | 0.32547 |
| mmu-miR-148a    | 10.75 | 0.74 | 3.8E-02 | 0.24546 | 10.23 | 0.92  | 5.4E-01 | 1.00000 |
| mmu-miR-551b    | 3.89  | 9.76 | 3.8E-02 | 0.24546 | 2.78  | 5.84  | 2.3E-02 | 0.14906 |
| mmu-miR-425     | 7.03  | 0.79 | 3.8E-02 | 0.24546 | 7.34  | 0.82  | 3.1E-02 | 0.18013 |
| mmu-miR-24      | 10.27 | 1.15 | 4.3E-02 | 0.26755 | 9.98  | 1.40  | 1.6E-03 | 0.02373 |
| mmu-miR-15a     | 12.04 | 1.07 | 4.4E-02 | 0.26755 | 11.97 | 1.34  | 5.9E-03 | 0.05808 |
| mmu-miR-187     | 5.12  | 0.36 | 4.4E-02 | 0.26755 | 5.50  | 0.39  | 3.1E-02 | 0.18125 |
| mmu-miR-130b    | 8.53  | 0.75 | 4.4E-02 | 0.26755 | 6.81  | 1.07  | 6.8E-01 | 1.00000 |
| mmu-miR-210     | 6.72  | 1.43 | 4.7E-02 | 0.28473 | 6.63  | 1.42  | 7.1E-02 | 0.33367 |
| mmu-miR-328     | 6.62  | 0.69 | 4.8E-02 | 0.28473 | 6.94  | 0.62  | 2.8E-03 | 0.03399 |
| mmu-miR-191     | 9.25  | 0.85 | 4.8E-02 | 0.28473 | 9.32  | 1.04  | 6.4E-01 | 1.00000 |
| mmu-miR-338-3p  | 6.55  | 0.50 | 5.1E-02 | 0.29489 | 6.56  | 0.60  | 2.6E-02 | 0.15930 |
| mmu-miR-141     | 9.06  | 1.60 | 5.1E-02 | 0.29714 | 9.49  | 1.42  | 1.1E-03 | 0.01810 |
| mmu-let-7f      | 13.09 | 0.93 | 5.2E-02 | 0.29964 | 13.11 | 0.82  | 7.9E-03 | 0.07042 |
| mmu-miR-335-3p  | 6.50  | 0.79 | 5.3E-02 | 0.30090 | 3.62  | 3.36  | 1.1E-01 | 0.40841 |
| mmu-miR-22      | 12.63 | 1.14 | 5.4E-02 | 0.30457 | 13.41 | 0.99  | 7.1E-01 | 1.00000 |
| mmu-miR-382     | 5.53  | 2.58 | 6.4E-02 | 0.35675 | 2.57  | 6.95  | 8.0E-02 | 0.36446 |
| mmu-miR-139-5p  | 5.66  | 0.37 | 6.5E-02 | 0.35845 | 6.04  | 0.84  | 1.3E-01 | 0.46334 |
| mmu-miR-324-5p  | 8.01  | 0.84 | 6.7E-02 | 0.36220 | 7.09  | 1.22  | 3.1E-02 | 0.18125 |
| mmu-miR-484     | 8.32  | 0.91 | 6.8E-02 | 0.36220 | 7.94  | 1.31  | 2.7E-02 | 0.16268 |
| mmu-miR-450a-5p | 10.36 | 0.83 | 6.9E-02 | 0.36220 | 9.23  | 0.70  | 2.2E-03 | 0.02910 |
| mmu-miR-331-3p  | 7.03  | 1.21 | 6.9E-02 | 0.36220 | 6.16  | 1.22  | 2.5E-01 | 0.73027 |
| mmu-miR-202-5p  | 4.57  | 1.49 | 7.1E-02 | 0.36935 | 4.49  | 0.86  | 6.5E-01 | 1.00000 |

|                 |       |      |         |         |       |       |         |         |
|-----------------|-------|------|---------|---------|-------|-------|---------|---------|
| mmu-miR-30b     | 12.29 | 0.84 | 7.2E-02 | 0.36935 | 12.72 | 1.05  | 5.2E-01 | 1.00000 |
| mmu-miR-433     | 4.09  | 7.96 | 7.3E-02 | 0.37111 | 0.98  | 2.66  | 2.1E-01 | 0.64896 |
| mmu-miR-434-5p  | 4.81  | 1.87 | 7.8E-02 | 0.39354 | 2.03  | 16.56 | 3.1E-05 | 0.00182 |
| mmu-miR-872     | 8.35  | 0.84 | 7.8E-02 | 0.39354 | 7.71  | 1.10  | 1.1E-01 | 0.40841 |
| mmu-miR-762     | 7.59  | 2.02 | 8.0E-02 | 0.39851 | 7.45  | 5.34  | 2.4E-02 | 0.15570 |
| mmu-miR-16      | 13.38 | 1.09 | 8.1E-02 | 0.40015 | 13.38 | 1.24  | 2.3E-03 | 0.02940 |
| mmu-miR-495     | 5.45  | 1.77 | 8.8E-02 | 0.43133 | 3.84  | 2.65  | 1.1E-01 | 0.41370 |
| mmu-miR-134     | 2.61  | 4.56 | 9.1E-02 | 0.44113 | 0.00  | 1.00  | 1.0E+00 | 1.00000 |
| mmu-miR-107     | 9.30  | 0.44 | 9.2E-02 | 0.44183 | 9.33  | 0.95  | 6.4E-01 | 1.00000 |
| mmu-miR-802     | 4.38  | 0.19 | 9.6E-02 | 0.44663 | 5.89  | 0.42  | 1.1E-02 | 0.08482 |
| mmu-miR-377     | 7.35  | 1.46 | 9.7E-02 | 0.44663 | 6.42  | 1.37  | 5.3E-02 | 0.27256 |
| mmu-miR-1941-3p | 2.81  | 0.24 | 1.0E-01 | 0.44663 | 1.28  | 0.76  | 7.8E-01 | 1.00000 |
| mmu-miR-717     | 2.01  | 4.21 | 1.0E-01 | 0.44663 | 2.12  | 0.46  | 2.8E-01 | 0.73909 |
| mmu-miR-770-3p  | 1.20  | 0.19 | 1.0E-01 | 0.44663 | 0.00  | 1.00  | 1.0E+00 | 1.00000 |
| mmu-miR-873     | 1.18  | 5.11 | 1.0E-01 | 0.44663 | 0.00  | 1.00  | 1.0E+00 | 1.00000 |
| mmu-miR-1187    | 0.75  | 0.35 | 1.0E-01 | 0.44663 | 0.45  | 1.86  | 3.6E-01 | 0.73909 |
| mmu-miR-322     | 11.00 | 1.23 | 1.0E-01 | 0.44663 | 9.70  | 1.03  | 7.9E-01 | 1.00000 |
| mmu-miR-759     | 1.02  | 4.08 | 1.0E-01 | 0.44663 | 0.30  | 1.51  | 3.6E-01 | 0.73909 |
| mmu-miR-669e    | 0.88  | 3.39 | 1.0E-01 | 0.44663 | 0.11  | 0.86  | 3.6E-01 | 0.73909 |
| mmu-miR-18a     | 0.92  | 3.60 | 1.0E-01 | 0.44663 | 0.00  | 1.00  | 1.0E+00 | 1.00000 |
| mmu-miR-493     | 1.00  | 3.98 | 1.1E-01 | 0.48339 | 0.00  | 1.00  | 1.0E+00 | 1.00000 |
| mmu-miR-290-5p  | 0.95  | 3.71 | 1.2E-01 | 0.51831 | 0.00  | 1.00  | 1.0E+00 | 1.00000 |
| mmu-miR-144     | 10.02 | 0.54 | 1.2E-01 | 0.52051 | 10.73 | 2.17  | 1.6E-01 | 0.53314 |
| mmu-miR-412     | 0.21  | 1.34 | 1.2E-01 | 0.52051 | 0.00  | 1.00  | 1.0E+00 | 1.00000 |
| mmu-let-7b      | 13.43 | 1.13 | 1.2E-01 | 0.52051 | 13.76 | 1.02  | 4.9E-01 | 0.99495 |
| mmu-miR-30a     | 11.96 | 0.83 | 1.3E-01 | 0.52992 | 12.20 | 0.79  | 1.1E-02 | 0.08482 |
| mmu-miR-146a    | 8.91  | 0.89 | 1.3E-01 | 0.54734 | 9.12  | 1.82  | 4.0E-03 | 0.04488 |
| mmu-miR-676     | 6.21  | 1.27 | 1.5E-01 | 0.60942 | 5.81  | 1.02  | 9.3E-01 | 1.00000 |
| mmu-miR-145     | 13.50 | 1.09 | 1.5E-01 | 0.61019 | 13.40 | 0.87  | 4.6E-02 | 0.24881 |
| mmu-miR-138     | 6.36  | 0.92 | 1.6E-01 | 0.64734 | 5.71  | 1.25  | 1.0E-02 | 0.08172 |
| mmu-miR-451     | 10.67 | 0.54 | 1.6E-01 | 0.64734 | 11.89 | 2.02  | 1.9E-01 | 0.59419 |
| mmu-miR-3471    | 4.62  | 2.41 | 1.6E-01 | 0.64734 | 2.28  | 1.37  | 7.4E-01 | 1.00000 |
| mmu-miR-31      | 5.79  | 1.60 | 1.6E-01 | 0.64932 | 5.70  | 3.16  | 3.1E-04 | 0.00832 |
| mmu-miR-743a    | 0.96  | 0.39 | 1.8E-01 | 0.68475 | 0.00  | 1.00  | 1.0E+00 | 1.00000 |
| mmu-miR-190b    | 7.82  | 1.09 | 1.8E-01 | 0.68475 | 8.02  | 1.21  | 4.5E-03 | 0.04893 |
| mmu-miR-342-3p  | 8.64  | 0.91 | 1.8E-01 | 0.68475 | 8.33  | 1.06  | 5.3E-01 | 1.00000 |
| mmu-miR-34a     | 6.57  | 1.36 | 1.8E-01 | 0.68475 | 6.82  | 1.25  | 7.0E-02 | 0.33367 |
| mmu-miR-466c-5p | 1.50  | 0.24 | 1.9E-01 | 0.72193 | 0.00  | 1.00  | 1.0E+00 | 1.00000 |
| mmu-miR-574-3p  | 7.23  | 1.24 | 1.9E-01 | 0.72769 | 6.92  | 1.60  | 1.8E-02 | 0.12535 |
| mmu-miR-409-5p  | 0.63  | 2.41 | 2.1E-01 | 0.77229 | 0.00  | 1.00  | 1.0E+00 | 1.00000 |
| mmu-miR-695     | 1.14  | 2.76 | 2.1E-01 | 0.78229 | 0.00  | 1.00  | 1.0E+00 | 1.00000 |
| mmu-miR-574-5p  | 1.33  | 3.59 | 2.1E-01 | 0.78949 | 0.64  | 2.43  | 1.0E-01 | 0.40699 |
| mmu-miR-181a    | 12.51 | 0.95 | 2.2E-01 | 0.80350 | 11.93 | 0.84  | 5.3E-02 | 0.27256 |
| mmu-miR-128     | 5.97  | 0.63 | 2.2E-01 | 0.81702 | 5.34  | 1.16  | 5.7E-01 | 1.00000 |
| mmu-miR-346     | 3.52  | 0.28 | 2.3E-01 | 0.82975 | 0.03  | 1.04  | 3.6E-01 | 0.73909 |
| mmu-miR-455     | 5.87  | 0.73 | 2.3E-01 | 0.82975 | 5.35  | 0.83  | 3.9E-01 | 0.80367 |
| mmu-miR-501-5p  | 3.73  | 1.23 | 2.3E-01 | 0.83208 | 2.52  | 4.89  | 6.7E-02 | 0.32520 |
| mmu-miR-154     | 8.85  | 0.92 | 2.4E-01 | 0.83208 | 8.76  | 1.06  | 1.7E-01 | 0.55869 |
| mmu-miR-369-3p  | 6.35  | 1.48 | 2.4E-01 | 0.83208 | 4.23  | 2.77  | 9.0E-02 | 0.38355 |
| mmu-miR-33      | 5.65  | 0.81 | 2.4E-01 | 0.84014 | 5.79  | 1.13  | 2.8E-01 | 0.73909 |
| mmu-miR-25      | 11.37 | 1.07 | 2.4E-01 | 0.84014 | 10.61 | 1.32  | 8.3E-03 | 0.07195 |
| mmu-miR-450b-3p | 2.90  | 0.34 | 2.5E-01 | 0.85454 | 1.24  | 0.19  | 1.1E-01 | 0.40852 |
| mmu-miR-193     | 5.46  | 1.32 | 2.5E-01 | 0.85454 | 6.41  | 0.93  | 6.7E-01 | 1.00000 |
| mmu-miR-691     | 3.73  | 0.25 | 2.5E-01 | 0.85533 | 5.12  | 0.40  | 5.8E-02 | 0.28601 |
| mmu-miR-296-5p  | 8.11  | 0.92 | 2.5E-01 | 0.86411 | 6.37  | 1.09  | 6.4E-01 | 1.00000 |

|                 |       |      |         |         |       |      |         |         |
|-----------------|-------|------|---------|---------|-------|------|---------|---------|
| mmu-miR-1955    | 7.67  | 1.13 | 2.6E-01 | 0.86411 | 7.79  | 1.07 | 3.1E-01 | 0.73909 |
| mmu-miR-133a    | 2.93  | 0.35 | 2.6E-01 | 0.86991 | 1.30  | 1.58 | 7.4E-01 | 1.00000 |
| mmu-miR-103     | 10.18 | 0.52 | 2.7E-01 | 0.86991 | 10.23 | 1.22 | 4.7E-02 | 0.24941 |
| mmu-miR-1188    | 1.57  | 0.30 | 2.7E-01 | 0.86991 | 0.55  | 2.14 | 3.6E-01 | 0.73909 |
| mmu-miR-331-5p  | 3.88  | 0.29 | 2.8E-01 | 0.86991 | 3.59  | 0.74 | 9.4E-02 | 0.38502 |
| mmu-miR-361     | 8.61  | 0.87 | 2.8E-01 | 0.86991 | 8.24  | 1.00 | 9.7E-01 | 1.00000 |
| mmu-miR-486     | 5.07  | 0.57 | 2.9E-01 | 0.86991 | 6.85  | 2.06 | 2.6E-01 | 0.73909 |
| mmu-miR-500     | 1.48  | 3.05 | 2.9E-01 | 0.86991 | 1.93  | 5.50 | 5.6E-02 | 0.28248 |
| mmu-miR-19a     | 10.77 | 1.05 | 2.9E-01 | 0.86991 | 10.06 | 1.49 | 5.0E-04 | 0.01219 |
| mmu-miR-30d     | 11.11 | 0.91 | 3.1E-01 | 0.86991 | 11.55 | 0.94 | 2.8E-01 | 0.73909 |
| mmu-miR-380-3p  | 2.13  | 2.89 | 3.1E-01 | 0.86991 | 0.52  | 2.05 | 3.6E-01 | 0.73909 |
| mmu-miR-205     | 8.81  | 1.26 | 3.2E-01 | 0.86991 | 8.84  | 1.87 | 7.1E-02 | 0.33367 |
| mmu-miR-466d-3p | 3.61  | 0.35 | 3.3E-01 | 0.86991 | 3.69  | 2.15 | 1.3E-01 | 0.46039 |
| mmu-miR-208b    | 4.23  | 1.50 | 3.4E-01 | 0.86991 | 4.32  | 0.84 | 2.3E-01 | 0.71079 |
| mmu-miR-129-5p  | 1.13  | 0.48 | 3.4E-01 | 0.86991 | 0.00  | 1.00 | 1.0E+00 | 1.00000 |
| mmu-miR-678     | 4.80  | 0.52 | 3.4E-01 | 0.86991 | 3.88  | 1.20 | 3.5E-01 | 0.73909 |
| mmu-miR-501-3p  | 0.63  | 2.41 | 3.5E-01 | 0.86991 | 1.18  | 1.67 | 5.4E-01 | 1.00000 |
| mmu-miR-1895    | 0.63  | 2.41 | 3.5E-01 | 0.86991 | 0.00  | 1.00 | 1.0E+00 | 1.00000 |
| mmu-miR-137     | 0.59  | 0.44 | 3.5E-01 | 0.86991 | 0.00  | 1.00 | 1.0E+00 | 1.00000 |
| mmu-miR-544     | 0.58  | 2.24 | 3.5E-01 | 0.86991 | 0.71  | 1.66 | 4.0E-01 | 0.81823 |
| mmu-miR-1904    | 0.58  | 2.24 | 3.5E-01 | 0.86991 | 0.00  | 1.00 | 1.0E+00 | 1.00000 |
| mmu-miR-212     | 0.54  | 2.12 | 3.5E-01 | 0.86991 | 1.21  | 5.34 | 1.0E-01 | 0.40699 |
| mmu-miR-466d-5p | 0.49  | 1.97 | 3.5E-01 | 0.86991 | 0.00  | 1.00 | 1.0E+00 | 1.00000 |
| mmu-miR-487b    | 0.47  | 1.91 | 3.5E-01 | 0.86991 | 0.00  | 1.00 | 1.0E+00 | 1.00000 |
| mmu-miR-1961    | 0.46  | 0.53 | 3.5E-01 | 0.86991 | 0.00  | 1.00 | 1.0E+00 | 1.00000 |
| mmu-miR-105     | 0.41  | 1.77 | 3.5E-01 | 0.86991 | 0.00  | 1.00 | 1.0E+00 | 1.00000 |
| mmu-miR-216a    | 0.41  | 1.77 | 3.5E-01 | 0.86991 | 0.00  | 1.00 | 1.0E+00 | 1.00000 |
| mmu-miR-1       | 0.40  | 1.73 | 3.5E-01 | 0.86991 | 0.88  | 3.38 | 2.4E-01 | 0.72182 |
| mmu-miR-1193    | 0.40  | 1.73 | 3.5E-01 | 0.86991 | 0.00  | 1.00 | 1.0E+00 | 1.00000 |
| mmu-miR-876-5p  | 0.38  | 0.59 | 3.5E-01 | 0.86991 | 2.83  | 0.47 | 4.9E-01 | 0.98007 |
| mmu-miR-880     | 0.38  | 0.59 | 3.5E-01 | 0.86991 | 0.15  | 1.23 | 3.6E-01 | 0.73909 |
| mmu-miR-767     | 0.37  | 0.60 | 3.5E-01 | 0.86991 | 0.00  | 1.00 | 1.0E+00 | 1.00000 |
| mmu-miR-337-5p  | 0.35  | 1.63 | 3.5E-01 | 0.86991 | 0.00  | 1.00 | 1.0E+00 | 1.00000 |
| mmu-miR-342-5p  | 0.35  | 1.63 | 3.5E-01 | 0.86991 | 0.00  | 1.00 | 1.0E+00 | 1.00000 |
| mmu-miR-1945    | 0.31  | 0.65 | 3.5E-01 | 0.86991 | 0.00  | 1.00 | 1.0E+00 | 1.00000 |
| mmu-miR-1949    | 0.30  | 1.52 | 3.5E-01 | 0.86991 | 0.70  | 2.63 | 3.3E-01 | 0.73909 |
| mmu-miR-1199    | 0.30  | 1.52 | 3.5E-01 | 0.86991 | 0.00  | 1.00 | 1.0E+00 | 1.00000 |
| mmu-miR-669h-5p | 0.23  | 1.38 | 3.5E-01 | 0.86991 | 0.52  | 2.05 | 1.1E-01 | 0.40841 |
| mmu-miR-1943    | 0.23  | 1.38 | 3.5E-01 | 0.86991 | 0.57  | 2.20 | 3.6E-01 | 0.73909 |
| mmu-miR-344     | 0.23  | 1.38 | 3.5E-01 | 0.86991 | 0.35  | 1.63 | 3.6E-01 | 0.73909 |
| mmu-miR-3474    | 0.23  | 1.38 | 3.5E-01 | 0.86991 | 0.00  | 1.00 | 1.0E+00 | 1.00000 |
| mmu-miR-466l    | 0.23  | 1.38 | 3.5E-01 | 0.86991 | 0.00  | 1.00 | 1.0E+00 | 1.00000 |
| mmu-miR-2137    | 0.21  | 1.34 | 3.5E-01 | 0.86991 | 0.00  | 1.00 | 1.0E+00 | 1.00000 |
| mmu-miR-874     | 0.17  | 0.79 | 3.5E-01 | 0.86991 | 0.55  | 0.47 | 3.6E-01 | 0.73909 |
| mmu-miR-488     | 0.17  | 0.79 | 3.5E-01 | 0.86991 | 0.00  | 1.00 | 1.0E+00 | 1.00000 |
| mmu-miR-743b-3p | 0.17  | 0.79 | 3.5E-01 | 0.86991 | 0.00  | 1.00 | 1.0E+00 | 1.00000 |
| mmu-miR-667     | 0.14  | 1.21 | 3.5E-01 | 0.86991 | 0.40  | 0.57 | 3.6E-01 | 0.73909 |
| mmu-miR-1963    | 0.14  | 0.83 | 3.5E-01 | 0.86991 | 0.03  | 1.04 | 3.6E-01 | 0.73909 |
| mmu-miR-301b    | 0.13  | 1.20 | 3.5E-01 | 0.86991 | 0.00  | 1.00 | 1.0E+00 | 1.00000 |
| mmu-miR-449a    | 0.13  | 1.20 | 3.5E-01 | 0.86991 | 0.00  | 1.00 | 1.0E+00 | 1.00000 |
| mmu-miR-491     | 0.13  | 1.20 | 3.5E-01 | 0.86991 | 0.00  | 1.00 | 1.0E+00 | 1.00000 |
| mmu-miR-496     | 0.13  | 1.20 | 3.5E-01 | 0.86991 | 0.00  | 1.00 | 1.0E+00 | 1.00000 |
| mmu-miR-688     | 0.13  | 1.20 | 3.5E-01 | 0.86991 | 0.00  | 1.00 | 1.0E+00 | 1.00000 |
| mmu-miR-666-3p  | 0.09  | 0.88 | 3.5E-01 | 0.86991 | 0.00  | 1.00 | 1.0E+00 | 1.00000 |

|                   |       |      |         |         |       |      |         |         |
|-------------------|-------|------|---------|---------|-------|------|---------|---------|
| mmu-miR-761       | 0.09  | 0.88 | 3.5E-01 | 0.86991 | 0.00  | 1.00 | 1.0E+00 | 1.00000 |
| mmu-miR-1947      | 0.08  | 1.12 | 3.5E-01 | 0.86991 | 0.94  | 0.86 | 8.8E-01 | 1.00000 |
| mmu-miR-1893      | 0.08  | 1.12 | 3.5E-01 | 0.86991 | 0.00  | 1.00 | 1.0E+00 | 1.00000 |
| mmu-miR-290-3p    | 0.08  | 1.12 | 3.5E-01 | 0.86991 | 0.00  | 1.00 | 1.0E+00 | 1.00000 |
| mmu-miR-3475      | 0.08  | 1.12 | 3.5E-01 | 0.86991 | 0.00  | 1.00 | 1.0E+00 | 1.00000 |
| mmu-miR-684       | 0.08  | 1.12 | 3.5E-01 | 0.86991 | 0.00  | 1.00 | 1.0E+00 | 1.00000 |
| mmu-miR-201       | 3.78  | 0.59 | 3.7E-01 | 0.90691 | 2.41  | 2.70 | 2.7E-01 | 0.73909 |
| mmu-miR-19b       | 10.61 | 0.93 | 3.7E-01 | 0.90691 | 9.88  | 1.51 | 6.9E-05 | 0.00316 |
| mmu-miR-130a      | 13.06 | 0.98 | 3.7E-01 | 0.90691 | 12.45 | 0.98 | 8.0E-01 | 1.00000 |
| mmu-miR-709       | 3.56  | 0.38 | 3.8E-01 | 0.92808 | 4.35  | 1.51 | 7.3E-03 | 0.06637 |
| mmu-miR-466a/b-3p | 5.77  | 0.86 | 3.9E-01 | 0.93880 | 5.05  | 1.17 | 3.2E-01 | 0.73909 |
| mmu-miR-741       | 4.83  | 1.24 | 3.9E-01 | 0.93926 | 4.79  | 0.53 | 1.3E-01 | 0.45196 |
| mmu-miR-323-5p    | 1.23  | 2.17 | 3.9E-01 | 0.93995 | 0.00  | 1.00 | 1.0E+00 | 1.00000 |
| mmu-miR-206       | 1.97  | 0.29 | 4.0E-01 | 0.94227 | 1.34  | 6.44 | 1.0E-02 | 0.08172 |
| mmu-miR-106b      | 10.04 | 0.96 | 4.0E-01 | 0.94831 | 9.41  | 1.46 | 6.5E-04 | 0.01461 |
| mmu-miR-423-3p    | 7.61  | 0.85 | 4.1E-01 | 0.95126 | 7.17  | 0.84 | 1.4E-01 | 0.50168 |
| mmu-miR-532-3p    | 6.26  | 0.78 | 4.1E-01 | 0.95126 | 5.25  | 2.73 | 6.5E-03 | 0.06117 |
| mmu-miR-7b        | 2.56  | 0.46 | 4.1E-01 | 0.95924 | 2.20  | 0.90 | 9.0E-01 | 1.00000 |
| mmu-miR-582-5p    | 1.88  | 0.35 | 4.1E-01 | 0.95924 | 4.00  | 0.28 | 9.4E-02 | 0.38502 |
| mmu-miR-423-5p    | 7.99  | 1.08 | 4.1E-01 | 0.95924 | 7.85  | 0.99 | 8.5E-01 | 1.00000 |
| mmu-miR-547       | 1.23  | 1.97 | 4.2E-01 | 0.96182 | 2.89  | 1.06 | 8.4E-01 | 1.00000 |
| mmu-miR-133b      | 0.99  | 0.58 | 4.2E-01 | 0.97489 | 0.11  | 0.86 | 3.6E-01 | 0.73909 |
| mmu-miR-664       | 4.54  | 1.34 | 4.3E-01 | 0.99199 | 4.73  | 1.04 | 9.1E-01 | 1.00000 |
| mmu-miR-497       | 7.64  | 0.92 | 4.4E-01 | 0.99811 | 7.58  | 1.78 | 9.6E-04 | 0.01716 |
| mmu-miR-1224      | 5.52  | 1.39 | 4.4E-01 | 1.00000 | 5.58  | 2.85 | 7.0E-03 | 0.06488 |
| mmu-miR-1929      | 3.31  | 2.24 | 4.5E-01 | 1.00000 | 3.21  | 1.80 | 3.2E-01 | 0.73909 |
| mmu-miR-1903      | 1.54  | 2.20 | 4.5E-01 | 1.00000 | 0.00  | 1.00 | 1.0E+00 | 1.00000 |
| mmu-miR-7a        | 1.91  | 0.37 | 4.6E-01 | 1.00000 | 0.78  | 2.96 | 8.1E-02 | 0.36446 |
| mmu-miR-202-3p    | 0.46  | 0.66 | 4.6E-01 | 1.00000 | 0.34  | 1.61 | 3.6E-01 | 0.73909 |
| mmu-miR-297c      | 5.83  | 0.76 | 4.6E-01 | 1.00000 | 5.41  | 1.27 | 3.9E-01 | 0.79461 |
| mmu-miR-701       | 3.69  | 0.44 | 4.7E-01 | 1.00000 | 0.73  | 2.75 | 1.5E-01 | 0.50663 |
| mmu-miR-122       | 3.64  | 3.66 | 4.7E-01 | 1.00000 | 5.29  | 1.33 | 8.0E-01 | 1.00000 |
| mmu-miR-181b/d    | 6.96  | 0.86 | 4.8E-01 | 1.00000 | 5.81  | 1.27 | 1.7E-02 | 0.12535 |
| mmu-miR-542-5p    | 5.44  | 0.81 | 4.8E-01 | 1.00000 | 3.73  | 0.83 | 5.3E-01 | 1.00000 |
| mmu-miR-875-5p    | 1.39  | 1.95 | 4.8E-01 | 1.00000 | 0.48  | 1.95 | 3.6E-01 | 0.73909 |
| mmu-miR-672       | 3.94  | 1.65 | 4.9E-01 | 1.00000 | 1.52  | 8.19 | 9.4E-04 | 0.01716 |
| mmu-miR-1942      | 1.99  | 0.38 | 4.9E-01 | 1.00000 | 1.56  | 2.20 | 3.5E-01 | 0.73909 |
| mmu-miR-101b      | 8.39  | 0.92 | 4.9E-01 | 1.00000 | 8.16  | 0.92 | 1.5E-01 | 0.50663 |
| mmu-miR-193b      | 7.06  | 0.92 | 5.0E-01 | 1.00000 | 7.26  | 0.90 | 1.5E-01 | 0.50663 |
| mmu-miR-136       | 8.59  | 1.11 | 5.1E-01 | 1.00000 | 7.63  | 1.32 | 3.9E-02 | 0.21620 |
| mmu-miR-876-3p    | 1.36  | 2.08 | 5.1E-01 | 1.00000 | 4.58  | 0.34 | 1.3E-04 | 0.00449 |
| mmu-miR-489       | 5.07  | 1.17 | 5.2E-01 | 1.00000 | 4.80  | 1.16 | 4.8E-01 | 0.98007 |
| mmu-miR-1194      | 1.96  | 0.42 | 5.2E-01 | 1.00000 | 0.48  | 1.95 | 3.6E-01 | 0.73909 |
| mmu-miR-505       | 1.82  | 0.48 | 5.2E-01 | 1.00000 | 0.00  | 1.00 | 1.0E+00 | 1.00000 |
| mmu-miR-1983      | 4.43  | 1.19 | 5.2E-01 | 1.00000 | 0.22  | 0.74 | 3.6E-01 | 0.73909 |
| mmu-miR-326       | 6.01  | 0.96 | 5.2E-01 | 1.00000 | 6.48  | 0.86 | 3.2E-01 | 0.73909 |
| mmu-miR-1933-5p   | 1.48  | 2.04 | 5.3E-01 | 1.00000 | 3.68  | 0.78 | 5.5E-01 | 1.00000 |
| mmu-miR-700       | 1.57  | 1.96 | 5.4E-01 | 1.00000 | 0.30  | 1.51 | 3.6E-01 | 0.73909 |
| mmu-miR-2183      | 7.67  | 0.85 | 5.4E-01 | 1.00000 | 7.47  | 1.04 | 7.0E-01 | 1.00000 |
| mmu-miR-665       | 1.39  | 1.80 | 5.4E-01 | 1.00000 | 0.00  | 1.00 | 1.0E+00 | 1.00000 |
| mmu-miR-190       | 4.98  | 0.75 | 5.4E-01 | 1.00000 | 6.54  | 0.69 | 6.5E-02 | 0.32186 |
| mmu-miR-98        | 10.30 | 0.95 | 5.6E-01 | 1.00000 | 10.28 | 0.87 | 4.6E-03 | 0.04893 |
| mmu-miR-125b-3p   | 5.59  | 0.92 | 5.6E-01 | 1.00000 | 5.50  | 0.96 | 8.6E-01 | 1.00000 |
| mmu-miR-541       | 3.29  | 1.85 | 5.6E-01 | 1.00000 | 0.67  | 2.52 | 7.1E-02 | 0.33367 |
| mmu-miR-29c       | 9.04  | 0.97 | 5.7E-01 | 1.00000 | 11.17 | 0.69 | 1.6E-02 | 0.11999 |

|                             |       |      |         |         |       |      |         |         |
|-----------------------------|-------|------|---------|---------|-------|------|---------|---------|
| mmu-miR-3472                | 1.98  | 0.54 | 5.7E-01 | 1.00000 | 0.46  | 1.88 | 1.0E-01 | 0.40699 |
| mmu-miR-224                 | 2.29  | 1.98 | 5.7E-01 | 1.00000 | 1.39  | 6.84 | 7.3E-04 | 0.01506 |
| mmu-miR-1306                | 2.42  | 0.54 | 5.7E-01 | 1.00000 | 1.46  | 4.12 | 1.8E-02 | 0.12700 |
| mmu-miR-92b                 | 5.72  | 1.20 | 5.7E-01 | 1.00000 | 4.57  | 1.06 | 6.5E-01 | 1.00000 |
| mmu-miR-713                 | 0.77  | 0.62 | 5.8E-01 | 1.00000 | 0.76  | 1.79 | 3.6E-01 | 0.73966 |
| mmu-miR-669a                | 4.63  | 0.79 | 5.8E-01 | 1.00000 | 3.91  | 1.52 | 2.8E-01 | 0.73909 |
| mmu-miR-153                 | 2.06  | 0.55 | 5.8E-01 | 1.00000 | 0.29  | 1.50 | 3.6E-01 | 0.73909 |
| mmu-miR-539                 | 5.26  | 0.79 | 5.9E-01 | 1.00000 | 4.34  | 1.69 | 8.8E-02 | 0.38299 |
| mmu-miR-1900                | 2.78  | 1.63 | 6.0E-01 | 1.00000 | 0.29  | 1.50 | 3.6E-01 | 0.73909 |
| mmu-miR-467f                | 4.39  | 0.59 | 6.0E-01 | 1.00000 | 4.19  | 2.04 | 4.6E-02 | 0.24881 |
| mmu-miR-1892                | 0.79  | 0.64 | 6.0E-01 | 1.00000 | 0.00  | 1.00 | 1.0E+00 | 1.00000 |
| mmu-miR-669o                | 2.36  | 0.64 | 6.1E-01 | 1.00000 | 3.43  | 1.76 | 2.2E-01 | 0.69037 |
| mmu-miR-871                 | 1.98  | 0.60 | 6.2E-01 | 1.00000 | 0.89  | 3.43 | 1.1E-01 | 0.41741 |
| mmu-miR-1964                | 1.31  | 1.47 | 6.2E-01 | 1.00000 | 0.17  | 0.79 | 3.6E-01 | 0.73909 |
| mmu-miR-340-3p              | 5.45  | 0.92 | 6.3E-01 | 1.00000 | 5.26  | 0.90 | 5.7E-01 | 1.00000 |
| mmu-miR-362-3p              | 5.05  | 0.90 | 6.3E-01 | 1.00000 | 5.51  | 2.18 | 1.0E-02 | 0.08271 |
| mmu-miR-2139                | 4.52  | 0.71 | 6.3E-01 | 1.00000 | 3.55  | 1.47 | 2.5E-01 | 0.73909 |
| mmu-miR-882                 | 1.64  | 1.72 | 6.4E-01 | 1.00000 | 0.00  | 1.00 | 1.0E+00 | 1.00000 |
| mmu-miR-1839-3p             | 5.36  | 0.84 | 6.5E-01 | 1.00000 | 4.91  | 1.14 | 5.5E-01 | 1.00000 |
| mmu-miR-429                 | 12.49 | 0.97 | 6.5E-01 | 1.00000 | 12.24 | 0.94 | 1.6E-01 | 0.53314 |
| mmu-miR-27b                 | 8.10  | 1.02 | 6.6E-01 | 1.00000 | 8.16  | 0.87 | 3.3E-01 | 0.73909 |
| mmu-miR-367                 | 4.10  | 0.76 | 6.6E-01 | 1.00000 | 2.35  | 6.74 | 3.2E-02 | 0.18367 |
| mmu-miR-421                 | 7.01  | 0.92 | 6.6E-01 | 1.00000 | 6.29  | 1.13 | 9.6E-02 | 0.38909 |
| mmu-miR-3473                | 3.38  | 1.33 | 6.7E-01 | 1.00000 | 1.02  | 4.09 | 2.6E-02 | 0.15930 |
| mmu-miR-34b-3p              | 0.69  | 0.73 | 6.7E-01 | 1.00000 | 0.03  | 1.04 | 3.6E-01 | 0.73909 |
| mmu-miR-879                 | 0.69  | 0.73 | 6.7E-01 | 1.00000 | 0.00  | 1.00 | 1.0E+00 | 1.00000 |
| mmu-miR-466g                | 6.52  | 1.04 | 6.7E-01 | 1.00000 | 6.38  | 1.03 | 8.4E-01 | 1.00000 |
| mmu-miR-374                 | 8.69  | 0.97 | 6.8E-01 | 1.00000 | 8.29  | 1.10 | 1.5E-01 | 0.50663 |
| mmu-miR-432                 | 2.11  | 0.62 | 6.8E-01 | 1.00000 | 0.00  | 1.00 | 1.0E+00 | 1.00000 |
| mmu-miR-1981                | 5.83  | 1.09 | 6.9E-01 | 1.00000 | 6.06  | 1.02 | 9.3E-01 | 1.00000 |
| mmu-miR-320                 | 1.68  | 1.42 | 6.9E-01 | 1.00000 | 2.12  | 0.49 | 5.0E-01 | 1.00000 |
| mmu-miR-542-3p              | 1.64  | 1.58 | 7.0E-01 | 1.00000 | 0.35  | 1.63 | 3.6E-01 | 0.73909 |
| mmu-miR-674                 | 5.71  | 1.10 | 7.0E-01 | 1.00000 | 5.06  | 1.28 | 8.1E-02 | 0.36446 |
| mmu-miR-467c                | 2.60  | 1.32 | 7.0E-01 | 1.00000 | 3.77  | 1.36 | 2.8E-01 | 0.73909 |
| mmu-miR-503                 | 5.04  | 1.04 | 7.0E-01 | 1.00000 | 0.92  | 0.63 | 3.3E-01 | 0.73909 |
| mmu-miR-490                 | 1.00  | 0.67 | 7.0E-01 | 1.00000 | 0.00  | 1.00 | 1.0E+00 | 1.00000 |
| mmu-miR-466k                | 3.64  | 0.69 | 7.0E-01 | 1.00000 | 0.84  | 1.19 | 8.3E-01 | 1.00000 |
| mmu-miR-1894-5p             | 0.93  | 0.74 | 7.1E-01 | 1.00000 | 0.00  | 1.00 | 1.0E+00 | 1.00000 |
| mmu-miR-125a-5p             | 13.19 | 0.99 | 7.1E-01 | 1.00000 | 12.35 | 1.15 | 6.2E-03 | 0.05986 |
| mmu-miR-467e                | 5.40  | 0.91 | 7.2E-01 | 1.00000 | 4.81  | 1.66 | 1.1E-01 | 0.40818 |
| mmu-miR-292-5p              | 1.04  | 1.47 | 7.2E-01 | 1.00000 | 2.21  | 1.06 | 9.6E-01 | 1.00000 |
| mmu-miR-669j                | 0.71  | 1.24 | 7.2E-01 | 1.00000 | 0.23  | 1.37 | 3.6E-01 | 0.73909 |
| mmu-miR-760                 | 1.15  | 0.74 | 7.3E-01 | 1.00000 | 0.15  | 1.23 | 3.6E-01 | 0.73909 |
| mmu-miR-1960                | 2.00  | 0.69 | 7.3E-01 | 1.00000 | 0.00  | 1.00 | 1.0E+00 | 1.00000 |
| mmu-miR-1197                | 0.90  | 1.37 | 7.3E-01 | 1.00000 | 0.12  | 1.18 | 3.6E-01 | 0.73909 |
| mmu-miR-151-3p              | 6.05  | 1.06 | 7.5E-01 | 1.00000 | 6.22  | 1.02 | 6.7E-01 | 1.00000 |
| mmu-miR-99b                 | 11.12 | 0.98 | 7.5E-01 | 1.00000 | 10.30 | 1.10 | 9.1E-02 | 0.38502 |
| mmu-miR-149                 | 5.46  | 1.06 | 7.5E-01 | 1.00000 | 4.91  | 0.48 | 8.9E-02 | 0.38299 |
| mmu-miR-467h+mmu-miR-669d/l | 0.55  | 0.84 | 7.6E-01 | 1.00000 | 0.15  | 1.23 | 3.6E-01 | 0.73909 |
| mmu-miR-300                 | 4.60  | 1.25 | 7.7E-01 | 1.00000 | 1.17  | 2.35 | 2.9E-01 | 0.73909 |
| mmu-miR-669f                | 8.15  | 0.99 | 7.7E-01 | 1.00000 | 7.51  | 1.01 | 9.5E-01 | 1.00000 |
| mmu-miR-155                 | 6.98  | 0.85 | 7.7E-01 | 1.00000 | 7.41  | 1.00 | 9.8E-01 | 1.00000 |
| mmu-miR-470                 | 0.43  | 1.13 | 7.8E-01 | 1.00000 | 0.76  | 0.35 | 1.0E-01 | 0.40699 |
| mmu-miR-298                 | 2.78  | 1.31 | 7.8E-01 | 1.00000 | 1.04  | 1.97 | 3.4E-01 | 0.73909 |
| mmu-miR-671-3p              | 1.97  | 1.33 | 7.8E-01 | 1.00000 | 0.23  | 1.37 | 3.6E-01 | 0.73909 |

|                 |       |      |         |         |       |      |         |         |
|-----------------|-------|------|---------|---------|-------|------|---------|---------|
| mmu-miR-804     | 3.98  | 1.23 | 7.8E-01 | 1.00000 | 4.36  | 7.09 | 1.0E-02 | 0.08172 |
| mmu-miR-467g    | 2.64  | 0.69 | 7.8E-01 | 1.00000 | 0.00  | 1.00 | 1.0E+00 | 1.00000 |
| mmu-miR-323-3p  | 1.66  | 1.39 | 7.9E-01 | 1.00000 | 0.75  | 1.31 | 7.3E-01 | 1.00000 |
| mmu-miR-485     | 0.78  | 1.16 | 7.9E-01 | 1.00000 | 0.00  | 1.00 | 1.0E+00 | 1.00000 |
| mmu-miR-124     | 2.17  | 1.36 | 7.9E-01 | 1.00000 | 0.34  | 1.61 | 3.6E-01 | 0.73909 |
| mmu-miR-652     | 7.13  | 1.03 | 8.0E-01 | 1.00000 | 6.56  | 1.15 | 2.5E-01 | 0.73027 |
| mmu-miR-509-5p  | 1.70  | 0.74 | 8.0E-01 | 1.00000 | 0.00  | 1.00 | 1.0E+00 | 1.00000 |
| mmu-miR-467a    | 4.81  | 0.93 | 8.1E-01 | 1.00000 | 4.53  | 1.72 | 1.8E-01 | 0.58413 |
| mmu-miR-1941-5p | 2.50  | 0.73 | 8.1E-01 | 1.00000 | 0.36  | 1.64 | 1.4E-01 | 0.49465 |
| mmu-miR-146b    | 6.21  | 0.97 | 8.1E-01 | 1.00000 | 6.12  | 1.22 | 3.4E-01 | 0.73909 |
| mmu-miR-152     | 10.84 | 1.01 | 8.2E-01 | 1.00000 | 10.43 | 1.06 | 2.4E-01 | 0.72508 |
| mmu-miR-376a    | 8.85  | 0.92 | 8.2E-01 | 1.00000 | 8.39  | 1.15 | 3.9E-01 | 0.79841 |
| mmu-miR-463     | 1.42  | 0.84 | 8.3E-01 | 1.00000 | 0.23  | 1.37 | 3.6E-01 | 0.73909 |
| mmu-miR-129-3p  | 1.03  | 0.80 | 8.3E-01 | 1.00000 | 0.43  | 1.81 | 3.1E-01 | 0.73909 |
| mmu-miR-883b-3p | 4.97  | 1.06 | 8.4E-01 | 1.00000 | 4.12  | 0.97 | 9.1E-01 | 1.00000 |
| mmu-miR-338-5p  | 2.63  | 0.83 | 8.4E-01 | 1.00000 | 2.07  | 0.63 | 6.0E-01 | 1.00000 |
| mmu-miR-770-5p  | 1.45  | 0.77 | 8.5E-01 | 1.00000 | 0.00  | 1.00 | 1.0E+00 | 1.00000 |
| mmu-miR-1953    | 2.65  | 1.30 | 8.5E-01 | 1.00000 | 3.60  | 0.65 | 2.9E-01 | 0.73909 |
| mmu-miR-1956    | 2.12  | 0.82 | 8.5E-01 | 1.00000 | 0.45  | 1.85 | 3.6E-01 | 0.73909 |
| mmu-miR-1192    | 0.78  | 0.88 | 8.5E-01 | 1.00000 | 0.14  | 0.83 | 3.6E-01 | 0.73909 |
| mmu-let-7c      | 14.41 | 1.00 | 8.6E-01 | 1.00000 | 14.77 | 1.04 | 3.5E-01 | 0.73909 |
| mmu-miR-1957    | 2.36  | 0.80 | 8.6E-01 | 1.00000 | 0.00  | 1.00 | 1.0E+00 | 1.00000 |
| mmu-miR-142-5p  | 5.94  | 1.03 | 8.6E-01 | 1.00000 | 6.66  | 0.91 | 6.1E-01 | 1.00000 |
| mmu-miR-15b     | 11.80 | 1.02 | 8.6E-01 | 1.00000 | 11.10 | 1.71 | 2.5E-03 | 0.03063 |
| mmu-miR-125b-5p | 13.88 | 0.99 | 8.7E-01 | 1.00000 | 13.72 | 1.14 | 2.7E-02 | 0.16268 |
| mmu-miR-710     | 2.09  | 0.84 | 8.7E-01 | 1.00000 | 0.23  | 1.37 | 3.6E-01 | 0.73909 |
| mmu-miR-1928    | 2.74  | 0.80 | 8.7E-01 | 1.00000 | 0.94  | 2.00 | 2.3E-01 | 0.69608 |
| mmu-miR-27a     | 12.17 | 1.01 | 8.8E-01 | 1.00000 | 12.05 | 1.27 | 9.5E-03 | 0.08002 |
| mmu-miR-875-3p  | 1.77  | 1.15 | 8.8E-01 | 1.00000 | 0.14  | 0.83 | 3.6E-01 | 0.73909 |
| mmu-miR-369-5p  | 2.88  | 0.85 | 8.8E-01 | 1.00000 | 0.23  | 1.38 | 3.6E-01 | 0.73909 |
| mmu-miR-675-5p  | 2.66  | 0.86 | 8.9E-01 | 1.00000 | 0.45  | 1.85 | 3.6E-01 | 0.73909 |
| mmu-miR-668     | 0.88  | 0.88 | 8.9E-01 | 1.00000 | 0.00  | 1.00 | 1.0E+00 | 1.00000 |
| mmu-miR-483     | 1.78  | 1.18 | 8.9E-01 | 1.00000 | 0.00  | 1.00 | 1.0E+00 | 1.00000 |
| mmu-miR-1946a   | 2.65  | 0.89 | 8.9E-01 | 1.00000 | 0.37  | 0.87 | 7.1E-01 | 1.00000 |
| mmu-miR-32      | 8.90  | 1.01 | 8.9E-01 | 1.00000 | 9.07  | 0.87 | 8.4E-02 | 0.37106 |
| mmu-miR-34b-5p  | 2.22  | 1.18 | 8.9E-01 | 1.00000 | 3.07  | 1.65 | 3.5E-02 | 0.19756 |
| mmu-miR-381     | 3.63  | 1.13 | 9.0E-01 | 1.00000 | 0.24  | 1.39 | 3.6E-01 | 0.73909 |
| mmu-miR-1958    | 1.89  | 1.14 | 9.0E-01 | 1.00000 | 0.00  | 1.00 | 1.0E+00 | 1.00000 |
| mmu-miR-683     | 2.41  | 0.86 | 9.1E-01 | 1.00000 | 0.00  | 1.00 | 1.0E+00 | 1.00000 |
| mmu-miR-883b-5p | 1.47  | 1.09 | 9.1E-01 | 1.00000 | 0.00  | 1.00 | 1.0E+00 | 1.00000 |
| mmu-miR-1195    | 2.32  | 1.14 | 9.1E-01 | 1.00000 | 0.30  | 1.51 | 3.6E-01 | 0.73909 |
| mmu-miR-1931    | 0.64  | 1.07 | 9.2E-01 | 1.00000 | 0.00  | 1.00 | 1.0E+00 | 1.00000 |
| mmu-miR-883a-3p | 0.78  | 0.93 | 9.3E-01 | 1.00000 | 0.00  | 1.00 | 1.0E+00 | 1.00000 |
| mmu-miR-1902    | 7.56  | 1.02 | 9.3E-01 | 1.00000 | 8.24  | 1.51 | 5.8E-03 | 0.05792 |
| mmu-miR-764-3p  | 3.25  | 0.88 | 9.4E-01 | 1.00000 | 2.48  | 4.42 | 3.7E-02 | 0.20428 |
| mmu-miR-764-5p  | 2.35  | 1.09 | 9.5E-01 | 1.00000 | 1.08  | 1.29 | 7.6E-01 | 1.00000 |
| mmu-miR-669i    | 2.26  | 0.93 | 9.5E-01 | 1.00000 | 1.68  | 0.28 | 2.4E-01 | 0.72198 |
| mmu-miR-203     | 8.53  | 1.00 | 9.6E-01 | 1.00000 | 8.59  | 0.86 | 2.5E-01 | 0.73909 |
| mmu-miR-3470a/b | 1.13  | 0.95 | 9.6E-01 | 1.00000 | 0.00  | 1.00 | 1.0E+00 | 1.00000 |
| mmu-miR-330     | 2.06  | 1.05 | 9.6E-01 | 1.00000 | 0.00  | 1.00 | 1.0E+00 | 1.00000 |
| mmu-miR-670     | 2.06  | 0.95 | 9.6E-01 | 1.00000 | 2.40  | 1.96 | 3.7E-01 | 0.76569 |
| mmu-let-7e      | 12.18 | 1.00 | 9.7E-01 | 1.00000 | 11.64 | 1.10 | 1.3E-01 | 0.45196 |
| mmu-miR-184     | 3.12  | 1.06 | 9.7E-01 | 1.00000 | 1.00  | 3.99 | 1.1E-01 | 0.41741 |
| mmu-miR-877     | 2.86  | 0.97 | 9.8E-01 | 1.00000 | 1.13  | 4.76 | 1.0E-01 | 0.40699 |
| mmu-miR-365     | 9.53  | 1.00 | 9.8E-01 | 1.00000 | 9.96  | 0.86 | 1.8E-01 | 0.57529 |

|                 |      |      |         |         |      |      |         |         |
|-----------------|------|------|---------|---------|------|------|---------|---------|
| mmu-miR-654-3p  | 2.61 | 0.98 | 9.9E-01 | 1.00000 | 0.40 | 1.75 | 7.1E-05 | 0.00316 |
| mmu-miR-363     | 0.00 | 1.00 | 1.0E+00 | 1.00000 | 0.91 | 0.29 | 1.1E-01 | 0.40841 |
| mmu-miR-337-3p  | 0.00 | 1.00 | 1.0E+00 | 1.00000 | 0.33 | 1.57 | 3.0E-01 | 0.73909 |
| mmu-miR-467b    | 0.00 | 1.00 | 1.0E+00 | 1.00000 | 0.60 | 0.43 | 3.6E-01 | 0.73909 |
| mmu-miR-1191    | 0.00 | 1.00 | 1.0E+00 | 1.00000 | 0.40 | 0.57 | 3.6E-01 | 0.73909 |
| mmu-miR-302d    | 0.00 | 1.00 | 1.0E+00 | 1.00000 | 0.40 | 0.57 | 3.6E-01 | 0.73909 |
| mmu-miR-743b-5p | 0.00 | 1.00 | 1.0E+00 | 1.00000 | 0.40 | 0.57 | 3.6E-01 | 0.73909 |
| mmu-miR-219     | 0.00 | 1.00 | 1.0E+00 | 1.00000 | 0.23 | 1.38 | 3.6E-01 | 0.73909 |
| mmu-miR-292-3p  | 0.00 | 1.00 | 1.0E+00 | 1.00000 | 0.15 | 1.23 | 3.6E-01 | 0.73909 |
| mmu-miR-1982    | 0.00 | 1.00 | 1.0E+00 | 1.00000 | 0.14 | 0.83 | 3.6E-01 | 0.73909 |
| mmu-miR-1901    | 0.00 | 1.00 | 1.0E+00 | 1.00000 | 0.12 | 1.18 | 3.6E-01 | 0.73909 |
| mmu-miR-465b-5p | 0.00 | 1.00 | 1.0E+00 | 1.00000 | 0.11 | 0.86 | 3.6E-01 | 0.73909 |
| mmu-miR-742     | 0.00 | 1.00 | 1.0E+00 | 1.00000 | 0.11 | 0.86 | 3.6E-01 | 0.73909 |
| mmu-miR-92a     | 0.00 | 1.00 | 1.0E+00 | 1.00000 | 0.03 | 1.04 | 3.6E-01 | 0.73909 |
| mmu-miR-450b-5p | 0.00 | 1.00 | 1.0E+00 | 1.00000 | 0.94 | 1.40 | 7.3E-01 | 1.00000 |
| mmu-miR-546     | 0.00 | 1.00 | 1.0E+00 | 1.00000 | 0.23 | 1.02 | 9.3E-01 | 1.00000 |
| mmu-miR-1186    | 0.00 | 1.00 | 1.0E+00 | 1.00000 | 0.00 | 1.00 | 1.0E+00 | 1.00000 |
| mmu-miR-1190    | 0.00 | 1.00 | 1.0E+00 | 1.00000 | 0.00 | 1.00 | 1.0E+00 | 1.00000 |
| mmu-miR-135b    | 0.00 | 1.00 | 1.0E+00 | 1.00000 | 0.00 | 1.00 | 1.0E+00 | 1.00000 |
| mmu-miR-139-3p  | 0.00 | 1.00 | 1.0E+00 | 1.00000 | 0.00 | 1.00 | 1.0E+00 | 1.00000 |
| mmu-miR-147     | 0.00 | 1.00 | 1.0E+00 | 1.00000 | 0.00 | 1.00 | 1.0E+00 | 1.00000 |
| mmu-miR-186     | 0.00 | 1.00 | 1.0E+00 | 1.00000 | 0.00 | 1.00 | 1.0E+00 | 1.00000 |
| mmu-miR-188-3p  | 0.00 | 1.00 | 1.0E+00 | 1.00000 | 0.00 | 1.00 | 1.0E+00 | 1.00000 |
| mmu-miR-1894-3p | 0.00 | 1.00 | 1.0E+00 | 1.00000 | 0.00 | 1.00 | 1.0E+00 | 1.00000 |
| mmu-miR-1896    | 0.00 | 1.00 | 1.0E+00 | 1.00000 | 0.00 | 1.00 | 1.0E+00 | 1.00000 |
| mmu-miR-1897-3p | 0.00 | 1.00 | 1.0E+00 | 1.00000 | 0.00 | 1.00 | 1.0E+00 | 1.00000 |
| mmu-miR-1898    | 0.00 | 1.00 | 1.0E+00 | 1.00000 | 0.00 | 1.00 | 1.0E+00 | 1.00000 |
| mmu-miR-1899    | 0.00 | 1.00 | 1.0E+00 | 1.00000 | 0.00 | 1.00 | 1.0E+00 | 1.00000 |
| mmu-miR-18b     | 0.00 | 1.00 | 1.0E+00 | 1.00000 | 0.00 | 1.00 | 1.0E+00 | 1.00000 |
| mmu-miR-1905    | 0.00 | 1.00 | 1.0E+00 | 1.00000 | 0.00 | 1.00 | 1.0E+00 | 1.00000 |
| mmu-miR-1906    | 0.00 | 1.00 | 1.0E+00 | 1.00000 | 0.00 | 1.00 | 1.0E+00 | 1.00000 |
| mmu-miR-1907    | 0.00 | 1.00 | 1.0E+00 | 1.00000 | 0.00 | 1.00 | 1.0E+00 | 1.00000 |
| mmu-miR-1927    | 0.00 | 1.00 | 1.0E+00 | 1.00000 | 0.00 | 1.00 | 1.0E+00 | 1.00000 |
| mmu-miR-1930    | 0.00 | 1.00 | 1.0E+00 | 1.00000 | 0.00 | 1.00 | 1.0E+00 | 1.00000 |
| mmu-miR-1932    | 0.00 | 1.00 | 1.0E+00 | 1.00000 | 0.00 | 1.00 | 1.0E+00 | 1.00000 |
| mmu-miR-1933-3p | 0.00 | 1.00 | 1.0E+00 | 1.00000 | 0.00 | 1.00 | 1.0E+00 | 1.00000 |
| mmu-miR-1934    | 0.00 | 1.00 | 1.0E+00 | 1.00000 | 0.00 | 1.00 | 1.0E+00 | 1.00000 |
| mmu-miR-1936    | 0.00 | 1.00 | 1.0E+00 | 1.00000 | 0.00 | 1.00 | 1.0E+00 | 1.00000 |
| mmu-miR-1938    | 0.00 | 1.00 | 1.0E+00 | 1.00000 | 0.00 | 1.00 | 1.0E+00 | 1.00000 |
| mmu-miR-1946b   | 0.00 | 1.00 | 1.0E+00 | 1.00000 | 0.00 | 1.00 | 1.0E+00 | 1.00000 |
| mmu-miR-1948    | 0.00 | 1.00 | 1.0E+00 | 1.00000 | 0.00 | 1.00 | 1.0E+00 | 1.00000 |
| mmu-miR-1950    | 0.00 | 1.00 | 1.0E+00 | 1.00000 | 0.00 | 1.00 | 1.0E+00 | 1.00000 |
| mmu-miR-1952    | 0.00 | 1.00 | 1.0E+00 | 1.00000 | 0.00 | 1.00 | 1.0E+00 | 1.00000 |
| mmu-miR-1954    | 0.00 | 1.00 | 1.0E+00 | 1.00000 | 0.00 | 1.00 | 1.0E+00 | 1.00000 |
| mmu-miR-1962    | 0.00 | 1.00 | 1.0E+00 | 1.00000 | 0.00 | 1.00 | 1.0E+00 | 1.00000 |
| mmu-miR-1966    | 0.00 | 1.00 | 1.0E+00 | 1.00000 | 0.00 | 1.00 | 1.0E+00 | 1.00000 |
| mmu-miR-1967    | 0.00 | 1.00 | 1.0E+00 | 1.00000 | 0.00 | 1.00 | 1.0E+00 | 1.00000 |
| mmu-miR-1968    | 0.00 | 1.00 | 1.0E+00 | 1.00000 | 0.00 | 1.00 | 1.0E+00 | 1.00000 |
| mmu-miR-1969    | 0.00 | 1.00 | 1.0E+00 | 1.00000 | 0.00 | 1.00 | 1.0E+00 | 1.00000 |
| mmu-miR-1970    | 0.00 | 1.00 | 1.0E+00 | 1.00000 | 0.00 | 1.00 | 1.0E+00 | 1.00000 |
| mmu-miR-1971    | 0.00 | 1.00 | 1.0E+00 | 1.00000 | 0.00 | 1.00 | 1.0E+00 | 1.00000 |
| mmu-miR-207     | 0.00 | 1.00 | 1.0E+00 | 1.00000 | 0.00 | 1.00 | 1.0E+00 | 1.00000 |
| mmu-miR-208a    | 0.00 | 1.00 | 1.0E+00 | 1.00000 | 0.00 | 1.00 | 1.0E+00 | 1.00000 |
| mmu-miR-211     | 0.00 | 1.00 | 1.0E+00 | 1.00000 | 0.00 | 1.00 | 1.0E+00 | 1.00000 |
| mmu-miR-2136    | 0.00 | 1.00 | 1.0E+00 | 1.00000 | 0.00 | 1.00 | 1.0E+00 | 1.00000 |







Supplementary Table 2: Commonly Dysregulated miRNAs in ADPKD models.

| UP                      | DOWN           |
|-------------------------|----------------|
| mmu-miR-182             | mmu-let-7g     |
| mmu-miR-183             | mmu-miR-99a    |
| mmu-miR-96              | mmu-miR-126-3p |
| mmu-miR-21              | mmu-miR-151-5p |
| mmu-miR-223             | mmu-miR-196a   |
| mmu-miR-199a-3p         | mmu-miR-26b    |
| mmu-miR-199a-5p         | mmu-miR-126-5p |
| mmu-miR-200c            | mmu-miR-30c    |
| mmu-miR-100             | mmu-miR-185    |
| mmu-miR-350             | mmu-miR-30e    |
| mmu-let-7i              | mmu-miR-194    |
| mmu-miR-20a+mmu-miR-20b | mmu-miR-378    |
| mmu-miR-28              | mmu-miR-192    |
| mmu-miR-106a+mmu-miR-17 |                |
| mmu-miR-532-5p          |                |
| mmu-miR-143             |                |

Supplementary Table 3: CT values of polysome shift assay (PSA)

| Treatment              | High Molecular Weight Fraction 3 |         |        |        | High Molecular Weight Fraction 4 |         |       |        | Kidney PSA Score          |
|------------------------|----------------------------------|---------|--------|--------|----------------------------------|---------|-------|--------|---------------------------|
|                        | miR-17                           | Let-7d  |        |        | miR-17                           | Let-7d  |       |        | Average ddCT Fraction 3+4 |
|                        | Ct Mean                          | Ct Mean | dCT    | ddCT   | Ct Mean                          | Ct Mean | dCT   | ddCT   |                           |
| PBS                    | 24.613                           | 22.832  | 1.781  | 0.640  | 25.404                           | 24.220  | 1.184 | -0.137 | 0.252                     |
| PBS                    | 25.247                           | 23.898  | 1.349  | 0.208  | 27.382                           | 25.194  | 2.188 | 0.867  | 0.538                     |
| PBS                    | 27.098                           | 26.479  | 0.619  | -0.522 | 25.233                           | 23.393  | 1.840 | 0.519  | -0.002                    |
| PBS                    | 23.410                           | 23.181  | 0.229  | -0.912 | 25.116                           | 24.855  | 0.260 | -1.060 | -0.986                    |
| PBS                    | 25.474                           | 24.601  | 0.873  | -0.268 | 24.983                           | 23.328  | 1.655 | 0.334  | 0.033                     |
| PBS                    | 22.794                           | 20.873  | 1.921  | 0.780  | 23.928                           | 22.618  | 1.310 | -0.011 | 0.385                     |
| PBS                    | 23.936                           | 23.103  | 0.833  | -0.308 | 23.627                           | 23.123  | 0.504 | -0.816 | -0.562                    |
| PBS                    | 25.803                           | 24.278  | 1.525  | 0.384  | 26.031                           | 24.406  | 1.624 | 0.304  | 0.344                     |
| anti-miR-17 (0.3mg/kg) | 25.169                           | 23.098  | 2.071  | 0.930  | 26.489                           | 24.627  | 1.862 | 0.541  | 0.736                     |
| anti-miR-17 (0.3mg/kg) | 27.501                           | 24.513  | 2.989  | 1.848  | 29.031                           | 26.428  | 2.602 | 1.281  | 1.565                     |
| anti-miR-17 (0.3mg/kg) | 26.641                           | 23.342  | 3.299  | 2.158  | 28.544                           | 25.404  | 3.140 | 1.819  | 1.988                     |
| anti-miR-17 (0.3mg/kg) | 25.899                           | 22.757  | 3.143  | 2.002  | 27.059                           | 23.991  | 3.068 | 1.747  | 1.875                     |
| anti-miR-17 (0.3mg/kg) | 26.012                           | 23.630  | 2.383  | 1.242  | 26.383                           | 23.793  | 2.590 | 1.270  | 1.256                     |
| anti-miR-17 (3mg/kg)   | 26.039                           | 22.736  | 3.303  | 2.162  | 27.467                           | 23.762  | 3.705 | 2.384  | 2.273                     |
| anti-miR-17 (3mg/kg)   | 27.601                           | 23.845  | 3.756  | 2.615  | 28.783                           | 25.172  | 3.611 | 2.290  | 2.452                     |
| anti-miR-17 (3mg/kg)   | 27.489                           | 23.214  | 4.275  | 3.134  | 29.416                           | 25.273  | 4.144 | 2.823  | 2.978                     |
| anti-miR-17 (3mg/kg)   | 26.003                           | 23.578  | 2.426  | 1.285  | 26.320                           | 24.203  | 2.118 | 0.797  | 1.041                     |
| anti-miR-17 (3mg/kg)   | 25.804                           | 23.541  | 2.262  | 1.121  | 26.667                           | 23.685  | 2.982 | 1.661  | 1.391                     |
| anti-miR-17 (30mg/kg)  | 27.129                           | 22.542  | 4.587  | 3.446  | 28.124                           | 24.369  | 3.755 | 2.435  | 2.940                     |
| anti-miR-17 (30mg/kg)  | 28.382                           | 23.869  | 4.513  | 3.372  | 28.797                           | 24.674  | 4.123 | 2.802  | 3.087                     |
| anti-miR-17 (30mg/kg)  | 28.627                           | 24.316  | 4.310  | 3.169  | 30.112                           | 25.228  | 4.884 | 3.563  | 3.366                     |
| anti-miR-17 (30mg/kg)  | 26.441                           | 23.118  | 3.323  | 2.182  | 26.265                           | 22.993  | 3.272 | 1.951  | 2.066                     |
| anti-miR-17 (30mg/kg)  | 26.224                           | 23.451  | 2.773  | 1.632  | 26.517                           | 22.278  | 4.239 | 2.919  | 2.275                     |
| Control (30mg/kg)      | 24.123                           | 22.582  | 1.542  | 0.401  | 26.319                           | 25.186  | 1.133 | -0.188 | 0.106                     |
| Control (30mg/kg)      | 25.270                           | 24.040  | 1.230  | 0.089  | 27.691                           | 26.223  | 1.467 | 0.147  | 0.118                     |
| Control (30mg/kg)      | 26.845                           | 27.007  | -0.161 | -1.302 | 25.646                           | 23.635  | 2.011 | 0.690  | -0.306                    |
| Control (30mg/kg)      | 23.612                           | 23.821  | -0.210 | -1.351 | 26.293                           | 24.911  | 1.382 | 0.062  | -0.644                    |
| Control (30mg/kg)      | 25.547                           | 23.762  | 1.785  | 0.644  | 25.120                           | 23.398  | 1.723 | 0.402  | 0.523                     |
| Control (30mg/kg)      | 26.598                           | 25.099  | 1.499  | 0.358  | 26.946                           | 25.398  | 1.549 | 0.228  | 0.293                     |
| Control (30mg/kg)      | 23.957                           | 21.751  | 2.205  | 1.064  | 25.466                           | 23.964  | 1.502 | 0.181  | 0.623                     |
| Control (30mg/kg)      | 25.330                           | 23.686  | 1.644  | 0.503  | 25.088                           | 24.201  | 0.886 | -0.434 | 0.035                     |

Supplementary Table 4: Differential expression of miR-17~92 putative targets  
(TargetScan) in *PKD1<sup>F/RC</sup>* mutant kidneys (DKO vs SKO)

| miR-17                  |          |             | miR-18a          |               |             | miR-92a                 |               |             |
|-------------------------|----------|-------------|------------------|---------------|-------------|-------------------------|---------------|-------------|
| Confidence              | Gene     | Fold Change | Confidence       | Gene          | Fold Change | Confidence              | Gene          | Fold Change |
| High (predicted)        | A1cf     | 2.858       | High (predicted) | Csmp3         | 2.493       | High (predicted)        | 4930402H24Rik | 2.133       |
| High (predicted)        | Ahrr     | 2.241       | High (predicted) | Fam166b       | 2.349       | High (predicted)        | Ahcy1         | 1.621       |
| High (predicted)        | Ak4      | 4.305       | High (predicted) | Fgf1          | 1.576       | High (predicted)        | Aifm2         | 1.646       |
| High (predicted)        | Ankrd29  | 1.860       | High (predicted) | Hlf           | 2.523       | High (predicted)        | Arpp19        | 1.623       |
| High (predicted)        | Arl4a    | 1.722       | High (predicted) | Kcna1         | 4.451       | High (predicted)        | Astn1         | 5.544       |
| High (predicted)        | Bcl11b   | 1.880       | High (predicted) | Rab9          | 1.880       | High (predicted)        | Atp6v1b2      | 1.730       |
| High (predicted)        | Bnc2     | 1.773       | High (predicted) | Robo2         | 2.641       | High (predicted)        | Bcl11b        | 1.880       |
| High (predicted)        | Cd274    | 1.939       | High (predicted) | Slc12a6       | 1.838       | High (predicted)        | Chchd10       | 4.790       |
| High (predicted)        | Cdc3711  | 2.079       | High (predicted) | Slc1a2        | 2.509       | High (predicted)        | Cldn11        | 5.191       |
| High (predicted)        | Cers6    | 1.720       | High (predicted) | Trib2         | 1.587       | High (predicted)        | Cpeb3         | 2.224       |
| High (predicted)        | Cpeb3    | 2.224       | High (predicted) | Uqcrb         | 4.830       | High (predicted)        | Csrnp3        | 2.493       |
| High (predicted)        | Cript    | 1.887       |                  |               |             | High (predicted)        | Dmx1          | 1.659       |
| High (predicted)        | Csrnp3   | 2.493       |                  |               |             | High (predicted)        | Dock5         | 1.652       |
| High (predicted)        | Dab2     | 1.632       |                  |               |             | High (predicted)        | Dpyd          | 2.542       |
| High (predicted)        | Dennd5b  | 1.729       |                  |               |             | High (predicted)        | Dynlt3        | 1.952       |
| High (predicted)        | Dlgap1   | 2.753       |                  |               |             | Experimentally Observed | Enpp6         | 3.840       |
| High (predicted)        | Dnajb6   | 1.803       | High (predicted) | 1810011010Rik | 2.072       | High (predicted)        | Eps8          | 1.848       |
| High (predicted)        | Dnajb9   | 1.772       | High (predicted) | 4930402H24Rik | 2.133       | High (predicted)        | Gclm          | 1.722       |
| High (predicted)        | Ehd3     | 2.392       | High (predicted) | Acsl1         | 2.076       | High (predicted)        | Gpr85         | 2.132       |
| High (predicted)        | Enpp5    | 1.722       | High (predicted) | Acsl3         | 1.581       | High (predicted)        | Gria3         | 2.255       |
| High (predicted)        | Epha5    | 15.074      | High (predicted) | Ak3           | 1.752       | High (predicted)        | Hand2         | 18.379      |
| High (predicted)        | Epha7    | 1.813       | High (predicted) | Ak4           | 4.305       | High (predicted)        | Hoxc4         | 1.834       |
| High (predicted)        | Fam210a  | 1.866       | High (predicted) | Arhgef26      | 1.834       | High (predicted)        | Idh1          | 1.854       |
| High (predicted)        | Foxj3    | 1.753       | High (predicted) | Arpp19        | 1.623       | High (predicted)        | Kcna1         | 4.451       |
| High (predicted)        | Fyco1    | 2.544       | High (predicted) | Atl2          | 1.636       | High (predicted)        | Kcnc4         | 41.962      |
| High (predicted)        | Gpr137b  | 2.815       | High (predicted) | Atp6v1b2      | 1.730       | High (predicted)        | Kcnk3         | 4.448       |
| High (predicted)        | Hlf      | 2.523       | High (predicted) | Bcat1         | 1.937       | High (predicted)        | Klf2          | 1.897       |
| High (predicted)        | Iltf1    | 2.010       | High (predicted) | Bnc2          | 1.773       | High (predicted)        | Lamp2         | 1.852       |
| High (predicted)        | Itg8     | 1.916       | High (predicted) | Coq10b        | 2.078       | High (predicted)        | Lurap11       | 2.021       |
| High (predicted)        | Lace1    | 2.014       | High (predicted) | Cpeb3         | 2.224       | High (predicted)        | Mcoln2        | 1.806       |
| High (predicted)        | Ldlrad3  | 1.639       | High (predicted) | Csmp3         | 2.493       | High (predicted)        | Mier3         | 1.865       |
| High (predicted)        | Map3k5   | 1.609       | High (predicted) | Dbt           | 2.075       | High (predicted)        | Mpp1          | 2.099       |
| High (predicted)        | Mfap3l   | 1.788       | High (predicted) | Dgkg          | 2.075       | High (predicted)        | Mrps25        | 1.925       |
| High (predicted)        | Mier3    | 1.865       | High (predicted) | Dmx2          | 1.625       | High (predicted)        | Nox4          | 2.801       |
| High (predicted)        | Nabp1    | 2.648       | High (predicted) | Dock5         | 1.652       | High (predicted)        | Pax9          | 36.555      |
| High (predicted)        | Napepld  | 2.144       | High (predicted) | Eif4a2        | 2.102       | High (predicted)        | Pex3          | 1.824       |
| High (predicted)        | Nceh1    | 1.657       | High (predicted) | Enpp5         | 1.722       | High (predicted)        | Ppcs          | 2.170       |
| High (predicted)        | Ndel1    | 1.556       | High (predicted) | Fam46a        | 1.617       | High (predicted)        | Prkar2b       | 5.035       |
| High (predicted)        | Neurod2  | 17.606      | High (predicted) | Fut9          | 2.323       | High (predicted)        | Ptprk         | 1.840       |
| High (predicted)        | Nhs      | 1.983       | High (predicted) | Gabarapl1     | 1.653       | High (predicted)        | Rab3b         | 1.852       |
| High (predicted)        | Ntrk3    | 3.167       | High (predicted) | Gpr137b       | 2.815       | High (predicted)        | Rbprms2       | 1.703       |
| High (predicted)        | Osr1     | 3.829       | High (predicted) | Grsf1         | 1.664       | High (predicted)        | Robo2         | 2.641       |
| Experimentally Observed | Pak7     | 3.392       | High (predicted) | Hecw2         | 2.586       | High (predicted)        | Sar1b         | 1.811       |
| High (predicted)        | Pex5l    | 2.158       | High (predicted) | Hlf           | 2.523       | High (predicted)        | Sgk1          | 2.417       |
| High (predicted)        | Plag1    | 2.157       | High (predicted) | Ifi44l        | 4.538       | High (predicted)        | Slc24a4       | 9.952       |
| High (predicted)        | Pls1     | 1.671       | High (predicted) | Kcnc4         | 41.962      | High (predicted)        | Slc25a36      | 1.751       |
| High (predicted)        | Plscr4   | 1.789       | High (predicted) | Lrp2          | 3.489       | High (predicted)        | Sorcs3        | 2.934       |
| High (predicted)        | Polr3g   | 1.744       | High (predicted) | Lrrtm2        | 5.657       | High (predicted)        | Sostdc1       | 2.657       |
| High (predicted)        | Ppara    | 1.982       | High (predicted) | Magi2         | 1.756       | High (predicted)        | Syn2          | 1.844       |
| Experimentally Observed | Pparg    | 2.836       | High (predicted) | Mapk14        | 1.525       | High (predicted)        | Taf15         | 1.858       |
| High (predicted)        | Ppp1r3b  | 2.807       | High (predicted) | Mfap3l        | 1.788       | High (predicted)        | Tef           | 1.733       |
| High (predicted)        | Ppp2ca   | 1.666       | High (predicted) | Mts1          | 1.587       | High (predicted)        | Uqcrb         | 4.830       |
| High (predicted)        | Ppp6c    | 1.604       | High (predicted) | Nanp          | 1.928       |                         |               |             |
| High (predicted)        | Ptger3   | 4.234       | High (predicted) | Neurod1       | 10.098      |                         |               |             |
| High (predicted)        | Ptpro    | 2.043       | High (predicted) | Nhs           | 1.983       |                         |               |             |
| High (predicted)        | Ranbp6   | 1.717       | High (predicted) | Papd4         | 1.674       |                         |               |             |
| High (predicted)        | Sar1b    | 1.811       | High (predicted) | Pax6          | 10.098      |                         |               |             |
| Moderate (predicted)    | Slc12a3  | 3.432       | High (predicted) | Pax5l         | 2.158       |                         |               |             |
| High (predicted)        | Slc16a9  | 2.599       | High (predicted) | Plag1         | 2.157       |                         |               |             |
| High (predicted)        | Slc1a2   | 2.509       | High (predicted) | Ppara         | 1.982       |                         |               |             |
| High (predicted)        | Slc24a2  | 10.098      | High (predicted) | Prkaa2        | 1.701       |                         |               |             |
| High (predicted)        | Slc24a4  | 9.952       | High (predicted) | Rheb1         | 2.512       |                         |               |             |
| High (predicted)        | Slc25a36 | 1.751       | High (predicted) | Ric3          | 1.916       |                         |               |             |
| High (predicted)        | Slc33a1  | 1.701       | High (predicted) | Robo2         | 2.641       |                         |               |             |
| High (predicted)        | Slc4a4   | 2.772       | High (predicted) | Rtn1          | 2.160       |                         |               |             |
| High (predicted)        | Slc5a3   | 2.283       | High (predicted) | Sar1b         | 1.811       |                         |               |             |
| High (predicted)        | St8sia3  | 11.680      | High (predicted) | Sec22a        | 2.199       |                         |               |             |
| High (predicted)        | Thrb     | 1.924       | High (predicted) | Sgk1          | 2.417       |                         |               |             |
| High (predicted)        | Timm17a  | 1.679       | High (predicted) | Sgms2         | 1.666       |                         |               |             |
| High (predicted)        | Tmem100  | 3.623       | High (predicted) | Slc26a4       | 2.474       |                         |               |             |
| High (predicted)        | Tmem64   | 1.739       | High (predicted) | Slc26a7       | 2.367       |                         |               |             |
| High (predicted)        | Tnfrsf21 | 1.729       | High (predicted) | Slc8a1        | 2.450       |                         |               |             |
| High (predicted)        | Trabd2b  | 1.921       | High (predicted) | St8sia3       | 11.680      |                         |               |             |
| High (predicted)        | Trps1    | 1.811       | High (predicted) | Steap2        | 1.616       |                         |               |             |
| High (predicted)        | Ttc39c   | 1.772       | High (predicted) | Sxbp4         | 1.636       |                         |               |             |
| High (predicted)        | Ube2q11  | 2.553       | High (predicted) | Tmem64        | 1.739       |                         |               |             |
| High (predicted)        | Ucp3     | 5.959       | High (predicted) | Tmem9b        | 1.661       |                         |               |             |
| High (predicted)        | Usp3     | 1.621       | High (predicted) | Trpc3         | 1.861       |                         |               |             |
| High (predicted)        | Vldlr    | 1.852       | High (predicted) | Trps1         | 1.811       |                         |               |             |
| High (predicted)        | Wac      | 1.670       | High (predicted) | Txlnq         | 1.772       |                         |               |             |
| High (predicted)        | Wnk1     | 2.338       | High (predicted) | Vstm2b        | 3.406       |                         |               |             |
|                         |          |             | High (predicted) | Wipf3         | 1.948       |                         |               |             |
|                         |          |             | High (predicted) | Wnk1          | 2.338       |                         |               |             |
|                         |          |             | High (predicted) | Zhx3          | 1.634       |                         |               |             |

Supplementary Table 5: Differential Expression of miR-17~92 putative targets (TargetScan) in *Pkd2* mutant kidneys (*KO* vs. *DKO*)

| miR-17                  |          |             | miR-18a              |          |             | miR-19b          |         |             | miR-92a          |          |             |
|-------------------------|----------|-------------|----------------------|----------|-------------|------------------|---------|-------------|------------------|----------|-------------|
| Confidence              | Gene     | Fold Change | Confidence           | Gene     | Fold Change | Confidence       | Gene    | Fold Change | Confidence       | Gene     | Fold Change |
| High (predicted)        | A1CF     | 1.397       | Moderate (predicted) | A1CF     | 1.397       | High (predicted) | ACADSB  | 1.208       | High (predicted) | ASTN1    | 1.492       |
| High (predicted)        | AHRR     | 2.664       | Moderate (predicted) | ABCD3    | 1.363       | High (predicted) | ACSL1   | 1.376       | High (predicted) | ATP2A2   | 1.150       |
| High (predicted)        | AK4      | 2.050       | Moderate (predicted) | ACAD11   | 1.260       | High (predicted) | AK3     | 1.124       | High (predicted) | BCAT2    | 1.271       |
| High (predicted)        | ALDH1A3  | 2.354       | Moderate (predicted) | ACO1     | 1.336       | High (predicted) | AK4     | 2.050       | High (predicted) | BCL11B   | 1.355       |
| Experimentally Observed | APP      | 1.081       | Moderate (predicted) | ADGRF1   | 1.836       | High (predicted) | AKAP1   | 1.137       | High (predicted) | CCNJL    | 1.166       |
| High (predicted)        | ATOH8    | 1.289       | Moderate (predicted) | ADRA1A   | 1.409       | High (predicted) | ATP2B2  | 1.518       | High (predicted) | CEND1    | 1.791       |
| High (predicted)        | ATP2B2   | 1.518       | Moderate (predicted) | ALDH5A1  | 1.273       | High (predicted) | BCAT1   | 2.078       | High (predicted) | CLDN11   | 4.186       |
| High (predicted)        | BCL11B   | 1.355       | Moderate (predicted) | ANGPT2   | 1.427       | High (predicted) | CAB39L  | 1.182       | High (predicted) | CPEB3    | 1.433       |
| High (predicted)        | CAMTA2   | 1.124       | Moderate (predicted) | AQP5     | 1.602       | High (predicted) | CADM4   | 1.213       | High (predicted) | DBT      | 1.248       |
| High (predicted)        | CDC37L1  | 1.121       | Moderate (predicted) | CNDP1    | 1.577       | High (predicted) | CISD3   | 1.257       | High (predicted) | DPYD     | 1.379       |
| High (predicted)        | COL4A3   | 1.303       | Moderate (predicted) | COL9A2   | 1.864       | High (predicted) | CPEB3   | 1.433       | High (predicted) | EPS8     | 1.168       |
| High (predicted)        | CPEB3    | 1.433       | Moderate (predicted) | DLST     | 1.220       | High (predicted) | CS      | 1.130       | High (predicted) | FAM150B  | 1.802       |
| Experimentally Observed | CRIM1    | 1.125       | Moderate (predicted) | ECHS1    | 1.210       | High (predicted) | CSPP1   | 1.120       | High (predicted) | GPR85    | 1.266       |
| High (predicted)        | CYP26B1  | 2.150       | Moderate (predicted) | EDA      | 1.258       | High (predicted) | CXCL12  | 1.336       | High (predicted) | GRIP2    | 1.367       |
| High (predicted)        | FBXO21   | 1.147       | Moderate (predicted) | EYA4     | 1.726       | High (predicted) | DBT     | 1.248       | High (predicted) | HOXD10   | 1.202       |
| High (predicted)        | FGF12    | 1.414       | Moderate (predicted) | FAM101A  | 1.188       | High (predicted) | ELOVL5  | 1.147       | High (predicted) | IDH1     | 1.291       |
| High (predicted)        | FOXO1    | 1.473       | Moderate (predicted) | FAM195A  | 1.443       | High (predicted) | EMC7    | 1.106       | High (predicted) | IQGAP2   | 1.182       |
| High (predicted)        | FZD7     | 1.184       | Moderate (predicted) | FBXO21   | 1.147       | High (predicted) | GPRC5B  | 1.238       | High (predicted) | ITPR1    | 1.203       |
| High (predicted)        | HLF      | 1.636       | Moderate (predicted) | FBXO9    | 1.132       | High (predicted) | HLF     | 1.636       | High (predicted) | KCNK3    | 2.426       |
| High (predicted)        | ISM1     | 1.226       | Moderate (predicted) | FN3KRP   | 1.184       | High (predicted) | HOXA9   | 1.268       | High (predicted) | KLHL14   | 1.195       |
| High (predicted)        | LACE1    | 1.205       | Moderate (predicted) | FXN      | 1.233       | High (predicted) | ICA1L   | 1.714       | High (predicted) | MAP4K2   | 1.152       |
| High (predicted)        | LDLRAD3  | 1.221       | Moderate (predicted) | GLUL     | 1.310       | High (predicted) | MFAP3L  | 1.156       | High (predicted) | MGLL     | 1.340       |
| High (predicted)        | LRP4     | 1.164       | Moderate (predicted) | GPAM     | 1.284       | High (predicted) | MINK1   | 1.107       | High (predicted) | MRPS25   | 1.169       |
| High (predicted)        | MFAP3L   | 1.156       | Moderate (predicted) | HADHA    | 1.143       | High (predicted) | MLEC    | 1.138       | High (predicted) | NEURL1B  | 1.225       |
| High (predicted)        | MGLL     | 1.340       | Moderate (predicted) | HEXIM1   | 1.160       | High (predicted) | MPRIIP  | 1.091       | High (predicted) | NFYC     | 1.236       |
| High (predicted)        | MINK1    | 1.107       | Moderate (predicted) | HNMT     | 1.226       | High (predicted) | NEURL1B | 1.225       | High (predicted) | PDE4D    | 1.194       |
| High (predicted)        | NABP1    | 1.208       | Moderate (predicted) | HNMT     | 1.226       | High (predicted) | NUS1    | 1.242       | High (predicted) | PLEKHA1  | 1.120       |
| High (predicted)        | NAPEPLD  | 1.339       | Moderate (predicted) | HSPB1L1  | 1.346       | High (predicted) | PCGF2   | 1.125       | High (predicted) | PTPRD    | 1.293       |
| High (predicted)        | NEURL1B  | 1.225       | Moderate (predicted) | HYAL1    | 1.197       | High (predicted) | PFN2    | 1.170       | High (predicted) | RBM47    | 1.155       |
| High (predicted)        | NKIRAS1  | 1.197       | Moderate (predicted) | IDH3G    | 1.212       | High (predicted) | PHACTR4 | 1.150       | High (predicted) | RBPMS2   | 1.275       |
| High (predicted)        | NRIP3    | 1.688       | Moderate (predicted) | IL15     | 1.435       | High (predicted) | PPARA   | 1.372       | High (predicted) | SGK1     | 1.702       |
| High (predicted)        | NTRK3    | 1.705       | Moderate (predicted) | IL15     | 1.435       | High (predicted) | PTPRD   | 1.293       | High (predicted) | SIM2     | 1.329       |
| High (predicted)        | PFN2     | 1.170       | Moderate (predicted) | KL       | 1.446       | High (predicted) | RNF167  | 1.214       | High (predicted) | SLC25A16 | 1.205       |
| High (predicted)        | PPARA    | 1.372       | Moderate (predicted) | ME1      | 1.240       | High (predicted) | RTN4RL1 | 1.210       | High (predicted) | SNN      | 1.103       |
| High (predicted)        | PRRG1    | 1.179       | Moderate (predicted) | MMAA     | 1.179       | High (predicted) | SCN4B   | 1.551       | High (predicted) | SOSTDC1  | 1.530       |
| High (predicted)        | PTGER3   | 1.514       | Moderate (predicted) | NCOA4    | 1.184       | High (predicted) | SGK1    | 1.702       | High (predicted) | TBX3     | 1.397       |
| High (predicted)        | PTPRD    | 1.293       | Moderate (predicted) | NDUFS1   | 1.253       | High (predicted) | SLC26A7 | 1.454       | High (predicted) | TEF      | 1.282       |
| High (predicted)        | RASL11B  | 1.223       | Moderate (predicted) | NKIRAS1  | 1.197       | High (predicted) | SLC35D1 | 1.233       | High (predicted) | TMEM143  | 1.351       |
| High (predicted)        | RBM24    | 2.021       | Moderate (predicted) | PAPSS2   | 1.334       | High (predicted) | SV2A    | 1.557       | High (predicted) | WNT5A    | 1.514       |
| High (predicted)        | RORC     | 1.624       | Moderate (predicted) | PAPSS2   | 1.334       | High (predicted) | THRB    | 1.338       | High (predicted) | WRNIP1   | 1.115       |
| High (predicted)        | SALL1    | 1.205       | Moderate (predicted) | PCGF2    | 1.125       | High (predicted) | TLN2    | 1.214       | High (predicted) | XPNPPEP3 | 1.155       |
| High (predicted)        | SLC16A9  | 1.454       | Moderate (predicted) | PCSK6    | 2.042       | High (predicted) | TMEM25  | 1.363       | High (predicted) | ZBTB40   | 1.167       |
| High (predicted)        | SLC22A23 | 1.236       | Moderate (predicted) | PDE1A    | 1.170       | High (predicted) | TOM1L2  | 1.138       | High (predicted) | ZFYVE21  | 1.289       |
| High (predicted)        | SLC29A2  | 1.285       | Moderate (predicted) | PDE1A    | 1.170       | High (predicted) | WIPF3   | 1.586       |                  |          |             |
| High (predicted)        | SLC2A4   | 1.673       | Moderate (predicted) | PDE4DIP  | 1.135       | High (predicted) | WNK1    | 1.176       |                  |          |             |
| High (predicted)        | SLC5A3   | 1.511       | Moderate (predicted) | PFKM     | 1.187       | High (predicted) | WRNIP1  | 1.115       |                  |          |             |
| High (predicted)        | SNX21    | 1.176       | Moderate (predicted) | PRSS12   | 1.170       |                  |         |             |                  |          |             |
| High (predicted)        | STC1     | 1.426       | Moderate (predicted) | PRSS12   | 1.170       |                  |         |             |                  |          |             |
| High (predicted)        | SYTL4    | 1.275       | Moderate (predicted) | SCG3     | 3.627       |                  |         |             |                  |          |             |
| High (predicted)        | TANC1    | 1.105       | Moderate (predicted) | SH3BGR2L | 1.110       |                  |         |             |                  |          |             |
| High (predicted)        | TBX3     | 1.397       | Moderate (predicted) | SLC16A10 | 1.281       |                  |         |             |                  |          |             |
| High (predicted)        | THRB     | 1.338       | Moderate (predicted) | SLC22A8  | 1.705       |                  |         |             |                  |          |             |
| High (predicted)        | TMEM25   | 1.363       | Moderate (predicted) | SLC34A1  | 1.608       |                  |         |             |                  |          |             |
| High (predicted)        | TMTC1    | 1.311       | Moderate (predicted) | SOWAHA   | 1.306       |                  |         |             |                  |          |             |
| High (predicted)        | USP46    | 1.143       | Moderate (predicted) | STARD8   | 1.240       |                  |         |             |                  |          |             |
| Experimentally Observed | VEGFA    | 1.278       | Moderate (predicted) | STK32B   | 1.328       |                  |         |             |                  |          |             |
| High (predicted)        | VLDLR    | 1.263       | Moderate (predicted) | TCEA2    | 1.250       |                  |         |             |                  |          |             |
| High (predicted)        | WASF3    | 1.235       | Moderate (predicted) | TM2D2    | 1.134       |                  |         |             |                  |          |             |
| High (predicted)        | WNK1     | 1.176       | Moderate (predicted) | UQCRCQ   | 1.219       |                  |         |             |                  |          |             |
| High (predicted)        | ZFP3     | 1.155       |                      |          |             |                  |         |             |                  |          |             |

Supplementary Table 6: Primers Used

| Gene            | Primer Sequence |                               |
|-----------------|-----------------|-------------------------------|
| <i>Pkd1</i>     | Forward         | 5'- TCTCGGAGCAGAATCAATGCC-3'  |
|                 | Reverse         | 5'-CAGAGTTGAGGGACAGTGAGAT-3'  |
| <i>Pkd2</i>     | Forward         | 5'-GCGTGGTACCCTCTTGGCAGTT-3'  |
|                 | Reverse         | 5'-CACGACAATCACAACATCC-3'     |
| <i>Kim1</i>     | Forward         | 5'-AGCAGTCGGTACAACCTTAAAGG-3' |
|                 | Reverse         | 5'-AGAGTTCTCTATCGTCAAGGACA-3' |
| <i>Ngal</i>     | Forward         | 5'-GCAGGTGGTACGTTGTGGG-3'     |
|                 | Reverse         | 5'-CTCTTGTAGCTCATAGATGGTGC-3' |
| <i>Acta2</i>    | Forward         | 5'-GTCCCAGACATCAGGGAGTAA-3'   |
|                 | Reverse         | 5'-TCGGATACTTCAGCGTCAGGA-3'   |
| <i>Vim</i>      | Forward         | 5'-CGTCCACACGCACCTACAG-3'     |
|                 | Reverse         | 5'-GGGGGATGAGGAATAGAGGCT-3'   |
| <i>Col4a6</i>   | Forward         | 5'-GCACCCTCACAAGCCATT-3'      |
|                 | Reverse         | 5'-CCAGGGGAGACTAGGGACTG-3'    |
| <i>Col1a1</i>   | Forward         | 5'-GCTCCTCTTAGGGGCCACT-3'     |
|                 | Reverse         | 5'-CCACGTCTCACCATTGGGG-3'     |
| <i>Ppara</i>    | Forward         | 5'-CCTCAAAGTCTGAGCGGTCT-3'    |
|                 | Reverse         | 5'-CTAACCTTGGGCCACACCT-3'     |
| <i>Ppargc1a</i> | Forward         | 5'-GTGAACATTCAAAGCAGCAGAG-3'  |
|                 | Reverse         | 5'-TTCTTCGTACAGCCATCAAAAA-3'  |
| <i>Pparg</i>    | Forward         | 5'-AGCTCCAAGAATACCAAAGTGC-3'  |
|                 | Reverse         | 5'-GATGCTTTATCCCAGACTC-3'     |
| <i>Sod2</i>     | Forward         | 5'-CAGACCTGCCTTACGACTATGG-3'  |
|                 | Reverse         | 5'-CTCGGTGGCGTTGAGATTGTT-3'   |
| <i>Me1</i>      | Forward         | 5'-GTCGTGCATCTCTCACAGAAG-3'   |
|                 | Reverse         | 5'-TGAGGGCAGTTGGTTTTATCTTT-3' |
| <i>Oxct1</i>    | Forward         | 5'-CATAAGGGGTGTGTCTGCTACT-3'  |
|                 | Reverse         | 5'-GCAAGGTTGCACCATTAGGAAT-3'  |
| <i>Pdk4</i>     | Forward         | 5'-AGGGAGGTCGAGCTGTTCTC-3'    |
|                 | Reverse         | 5'-GGAGTGTTCACTAAGCGGTCA-3'   |
| <i>Cpt2</i>     | Forward         | 5'-CAGCACAGCATCGTACCCA-3'     |
|                 | Reverse         | 5'-TCCCAATGCCGTTCTCAAAAT-3'   |
| <i>Slc27a2</i>  | Forward         | 5'-CGAGACGAGACGCTCACCTA-3'    |
|                 | Reverse         | 5'-ACGAATGTTGTAGTTGAGGCAC-3'  |
| <i>Cd36</i>     | Forward         | 5'-ATGGGCTGTGATCGGAACTG-3'    |
|                 | Reverse         | 5'-TTTGCCACGTCATCTGGGTTT-3'   |
| <i>Etfdh</i>    | Forward         | 5'-GTGCGACTAACCCCTGTC-3'      |
|                 | Reverse         | 5'-GGATGAACAGTGTAGTGAGTGG-3'  |
| <i>Etfα</i>     | Forward         | 5'-GCCTCATTGCTCCGTTTTCAG-3'   |
|                 | Reverse         | 5'-GCTACTAAGCAGGACACTTCAC-3'  |
| <i>Etfβ</i>     | Forward         | 5'-CTGTCAAGAGGTCATCGACT-3'    |
|                 | Reverse         | 5'-CACAGAAGGGGTTTCATGGAGT-3'  |
| <i>Cmyc</i>     | Forward         | 5'-CTGAGCCCCTAGTGCTGCATGA3'   |
|                 | Reverse         | 5'-GGGGTTTGCCTCTTCTCCACAG-3'  |
| <i>hPPARA</i>   | Forward         | 5'-GGAGTTTATGAGGCCATATTCG-3'  |
|                 | Reverse         | 5'-CAAAATCAAACCTGGGTTCCAT-3'  |

### Supplementary References:

1. Androsavich JR, *et al.* Polysome shift assay for direct measurement of miRNA inhibition by anti-miRNA drugs. *Nucleic Acids Res* **44**, e13 (2016).
2. Song X, *et al.* Systems Biology of Autosomal Dominant Polycystic Kidney Disease (ADPKD): Computational Identification of Gene Expression Pathways and Integrated Regulatory Networks. *Hum Mol Genet*, (2009).
